# Supplementary material
Source: PubMed Central journal article supplement (PMC7539781)
Supplement: ajcr0010-2955-f5.pdf [file ajcr0010-2955-f5.pdf]

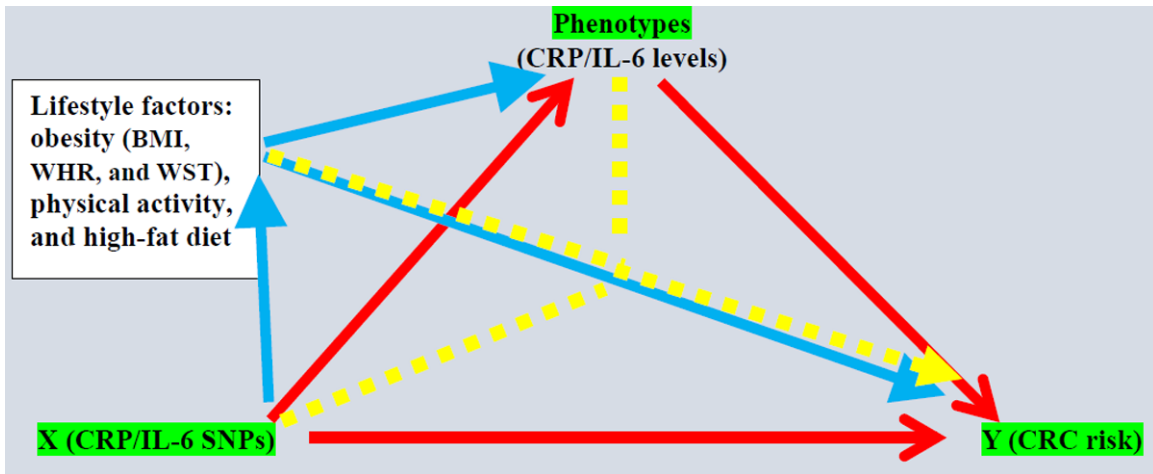

**Figure S1.** Empirical pathways of pro-inflammatory SNPs, phenotypes, and CRC risk, interplaying with obesity status and obesity-lifestyle factors (Note: pathways in red and blue lines were tested in our previous GWA G×E and current post-GWA analyses; yellow lines reflect conceptual framework. BMI, body mass index; CRC, colorectal cancer; CRP, C-reactive protein; G×E, gene-environment interaction; GWA, genome-wide analysis; IL-6, interleukin-6; SNP, single-nucleotide polymorphism; WHR, waist-to-hip ratio; WST, waist circumference).

Inflammatory genetic markers and CRC: post-GWAS RSF

**Table S1A.** Allele frequencies (total n=10,798) of the 87 SNPs associated with pro-inflammatory phenotypes from our previous GWA analysis

| Chr | Position¥ | Gene              | SNP         | Allele |     | Alt Allele Frequency |         |           |           |         |         |
|-----|-----------|-------------------|-------------|--------|-----|----------------------|---------|-----------|-----------|---------|---------|
|     |           |                   |             | Ref    | Alt | AS264                | GARNET  | GECCOCYTO | GECCOINIT | HIPFX   | WHIMS   |
|     |           |                   |             |        |     | n=1,603              | n=2,382 | n=1,177   | n=216     | n=1,909 | n=3,511 |
| 1   | 159652939 | CRPP1             | rs2592887   | C      | T   | 0.41                 | 0.41    | 0.41      | 0.38      | 0.40    | 0.39    |
| 1   | 159653599 | CRPP1             | rs1470515   | C      | T   | 0.40                 | 0.39    | 0.40      | 0.37      | 0.38    | 0.38    |
| 1   | 159655726 | CRPP1             | rs2592902   | G      | T   | 0.40                 | 0.39    | 0.40      | 0.37      | 0.38    | 0.38    |
| 1   | 159665921 | CRPP1             | rs2808624   | C      | G   | 0.40                 | 0.39    | 0.40      | 0.36      | 0.38    | 0.38    |
| 1   | 159668984 | CRPP1             | rs11265257  | C      | T   | 0.40                 | 0.39    | 0.40      | 0.36      | 0.38    | 0.38    |
| 1   | 159674933 | CRPP1             | rs876537    | C      | T   | 0.40                 | 0.39    | 0.40      | 0.36      | 0.38    | 0.38    |
| 1   | 159676011 | CRPP1             | rs2808628   | G      | A   | 0.34                 | 0.34    | 0.34      | 0.32      | 0.33    | 0.33    |
| 1   | 159676796 | CRPP1             | rs2808629   | G      | A   | 0.34                 | 0.34    | 0.35      | 0.32      | 0.33    | 0.33    |
| 1   | 159678816 | CRPP1/CRP         | rs2794520   | C      | T   | 0.34                 | 0.34    | 0.34      | 0.32      | 0.33    | 0.33    |
| 1   | 159682233 | CRP               | rs1205      | C      | T   | 0.34                 | 0.34    | 0.34      | 0.32      | 0.33    | 0.33    |
| 1   | 159684665 | CRP               | rs3091244   | G      | A   | 0.32                 | 0.36    | 0.32      | 0.34      | 0.34    | 0.37    |
| 1   | 159689388 | CRP               | rs2027471   | T      | A   | 0.35                 | 0.35    | 0.35      | 0.33      | 0.33    | 0.33    |
| 1   | 159691559 | CRP               | rs1341665   | G      | A   | 0.35                 | 0.35    | 0.35      | 0.33      | 0.33    | 0.33    |
| 1   | 159693605 | CRP               | rs2211320   | G      | A   | 0.33                 | 0.33    | 0.33      | 0.31      | 0.31    | 0.32    |
| 1   | 159694779 | CRP               | rs7551731   | T      | C   | 0.34                 | 0.34    | 0.34      | 0.32      | 0.32    | 0.33    |
| 1   | 159698549 | CRP               | rs7553007   | G      | A   | 0.34                 | 0.34    | 0.34      | 0.31      | 0.32    | 0.32    |
| 1   | 159699249 | CRP               | rs4546916   | G      | T   | 0.34                 | 0.34    | 0.34      | 0.31      | 0.32    | 0.32    |
| 1   | 159703442 | CRP               | rs4287174   | T      | A   | 0.34                 | 0.34    | 0.34      | 0.31      | 0.32    | 0.32    |
| 1   | 159703462 | CRP               | rs4428887   | A      | G   | 0.35                 | 0.34    | 0.35      | 0.32      | 0.33    | 0.33    |
| 1   | 159706230 | CRP               | rs12037186  | A      | G   | 0.33                 | 0.33    | 0.33      | 0.30      | 0.31    | 0.32    |
| 1   | 159708825 | CRP/RP11-419N10.5 | rs12042360  | G      | A   | 0.16                 | 0.17    | 0.18      | 0.16      | 0.16    | 0.15    |
| 1   | 159713844 | CRP/RP11-419N10.5 | rs12049404  | C      | T   | 0.16                 | 0.17    | 0.18      | 0.16      | 0.16    | 0.15    |
| 1   | 159717162 | CRP/RP11-419N10.5 | rs11588887  | G      | A   | 0.16                 | 0.17    | 0.18      | 0.16      | 0.16    | 0.15    |
| 9   | 118330052 | DEC1              | rs149109490 | T      | C   | 0.99                 | 0.99    | 0.99      | 0.99      | 0.99    | 0.99    |
| 12  | 121380544 | HNF1A-AS1         | rs2649999   | T      | C   | NA                   | 0.66    | 0.67      | NA        | 0.68    | 0.65    |
| 12  | 121384495 | HNF1A-AS1         | rs11065358  | T      | C   | NA                   | 0.63    | 0.63      | NA        | 0.64    | 0.62    |
| 12  | 121388559 | HNF1A-AS1         | rs1696359   | T      | C   | NA                   | 0.65    | 0.66      | NA        | 0.67    | 0.64    |
| 12  | 121388962 | HNF1A-AS1         | rs2650000   | A      | C   | 0.66                 | 0.65    | 0.66      | NA        | 0.67    | 0.65    |
| 12  | 121390078 | HNF1A-AS1         | rs2701194   | A      | G   | NA                   | 0.63    | 0.65      | NA        | 0.66    | 0.63    |
| 12  | 121391671 | HNF1A-AS1         | rs2701175   | C      | A   | 0.63                 | 0.61    | 0.63      | NA        | 0.64    | 0.61    |
| 12  | 121392040 | HNF1A-AS1         | rs11065365  | G      | A   | NA                   | 0.55    | 0.56      | NA        | 0.57    | 0.54    |
| 12  | 121392341 | HNF1A-AS1         | rs1732391   | C      | T   | 0.66                 | 0.65    | 0.66      | NA        | 0.67    | 0.65    |

Inflammatory genetic markers and CRC: post-GWAS RSF

|    |           |           |             |   |   |      |      |      |      |      |      |
|----|-----------|-----------|-------------|---|---|------|------|------|------|------|------|
| 12 | 121397875 | HNF1A-AS1 | rs6489786   | A | G | 0.66 | 0.65 | 0.66 | NA   | 0.67 | 0.65 |
| 12 | 121398654 | HNF1A-AS1 | rs7954039   | A | C | 0.66 | 0.65 | 0.66 | NA   | 0.67 | 0.65 |
| 12 | 121398657 | HNF1A-AS1 | rs7954331   | G | T | 0.66 | 0.65 | 0.66 | NA   | 0.67 | 0.65 |
| 12 | 121403724 | HNF1A-AS1 | rs7953249   | G | A | 0.59 | 0.58 | 0.59 | NA   | 0.60 | 0.58 |
| 12 | 121404155 | HNF1A-AS1 | rs7135337   | A | C | 0.58 | 0.57 | 0.58 | NA   | 0.58 | 0.57 |
| 12 | 121404584 | HNF1A-AS1 | rs1920792   | C | T | 0.51 | 0.53 | 0.53 | NA   | 0.51 | 0.53 |
| 12 | 121405126 | HNF1A-AS1 | rs2251468   | C | A | 0.66 | 0.65 | 0.66 | NA   | 0.67 | 0.65 |
| 12 | 121405210 | HNF1A-AS1 | rs10774579  | C | T | 0.51 | 0.53 | 0.52 | NA   | 0.51 | 0.53 |
| 12 | 121406293 | HNF1A-AS1 | rs2393792   | A | G | 0.50 | 0.53 | 0.52 | NA   | 0.51 | 0.53 |
| 12 | 121406370 | HNF1A-AS1 | rs2243616   | G | T | 0.65 | 0.64 | 0.65 | NA   | 0.66 | 0.63 |
| 12 | 121413027 | HNF1A-AS1 | rs148608463 | A | G | 0.66 | 0.65 | 0.66 | NA   | 0.67 | 0.65 |
| 12 | 121413345 | HNF1A-AS1 | rs142632970 | G | A | 0.68 | 0.67 | 0.68 | NA   | 0.69 | 0.67 |
| 12 | 121414915 | HNF1A-AS1 | rs2255531   | A | G | 0.65 | 0.64 | 0.65 | NA   | 0.67 | 0.64 |
| 12 | 121415293 | HNF1A-AS1 | rs7139079   | G | A | 0.59 | 0.58 | 0.60 | NA   | 0.60 | 0.58 |
| 12 | 121415390 | HNF1A-AS1 | rs2464190   | C | T | 0.58 | 0.55 | 0.59 | NA   | 0.58 | 0.56 |
| 12 | 121416622 | HNF1A     | rs1169289   | G | C | 0.57 | 0.54 | 0.58 | NA   | 0.57 | 0.55 |
| 12 | 121416650 | HNF1A     | rs1169288   | C | A | 0.68 | 0.67 | 0.68 | NA   | 0.69 | 0.67 |
| 12 | 121416988 | HNF1A     | rs2244608   | G | A | 0.68 | 0.67 | 0.68 | NA   | 0.70 | 0.67 |
| 12 | 121419056 | HNF1A     | rs1169286   | C | T | 0.58 | 0.56 | 0.57 | NA   | 0.59 | 0.57 |
| 12 | 121419926 | HNF1A     | rs1169284   | C | T | 0.68 | 0.68 | 0.69 | NA   | 0.70 | 0.68 |
| 12 | 121420260 | HNF1A     | rs7979473   | A | G | 0.60 | 0.61 | 0.62 | NA   | 0.61 | 0.61 |
| 12 | 121420263 | HNF1A     | rs7979478   | A | G | 0.60 | 0.60 | 0.61 | NA   | 0.61 | 0.61 |
| 12 | 121420807 | HNF1A     | rs1183910   | A | G | 0.69 | 0.68 | 0.69 | NA   | 0.70 | 0.68 |
| 12 | 121423285 | HNF1A     | rs11065384  | T | C | 0.68 | 0.68 | 0.69 | NA   | 0.70 | 0.68 |
| 12 | 121423376 | HNF1A     | rs7970695   | G | A | 0.62 | 0.61 | 0.62 | NA   | 0.63 | 0.61 |
| 12 | 121423386 | HNF1A     | rs11065385  | A | G | 0.69 | 0.68 | 0.69 | NA   | 0.70 | 0.68 |
| 12 | 121423659 | HNF1A     | rs9738226   | A | G | 0.62 | 0.61 | 0.62 | NA   | 0.63 | 0.61 |
| 12 | 121423956 | HNF1A     | rs2393791   | C | T | 0.62 | 0.61 | 0.62 | NA   | 0.63 | 0.61 |
| 12 | 121424406 | HNF1A     | rs2393776   | G | A | 0.62 | 0.61 | 0.62 | 0.60 | 0.63 | 0.61 |
| 12 | 121424490 | HNF1A     | rs2243458   | T | C | 0.69 | 0.68 | 0.69 | 0.66 | 0.70 | 0.68 |
| 12 | 121424574 | HNF1A     | rs2393775   | G | A | 0.62 | 0.61 | 0.62 | 0.60 | 0.63 | 0.61 |
| 12 | 121424861 | HNF1A     | rs7310409   | A | G | 0.62 | 0.61 | 0.62 | 0.59 | 0.63 | 0.61 |
| 12 | 121426478 | HNF1A     | rs1169292   | T | C | 0.69 | 0.68 | 0.69 | 0.67 | 0.70 | 0.68 |
| 12 | 121426594 | HNF1A     | rs1169294   | A | G | 0.69 | 0.68 | 0.69 | 0.67 | 0.70 | 0.68 |
| 12 | 121431225 | HNF1A     | rs1169300   | A | G | 0.70 | 0.69 | 0.71 | 0.69 | 0.72 | 0.70 |
| 12 | 121431300 | HNF1A     | rs1169301   | T | C | 0.70 | 0.69 | 0.71 | 0.69 | 0.72 | 0.70 |

Inflammatory genetic markers and CRC: post-GWAS RSF

|    |           |          |            |   |   |      |      |      |      |      |      |
|----|-----------|----------|------------|---|---|------|------|------|------|------|------|
| 12 | 121432603 | HNF1A    | rs2264782  | T | C | 0.65 | 0.63 | 0.66 | 0.63 | 0.66 | 0.65 |
| 12 | 121434833 | HNF1A    | rs2259852  | A | G | 0.65 | 0.63 | 0.66 | 0.63 | 0.66 | 0.64 |
| 12 | 121435342 | HNF1A    | rs2259820  | T | C | 0.70 | 0.69 | 0.71 | 0.69 | 0.72 | 0.70 |
| 12 | 121435427 | HNF1A    | rs2464196  | A | G | 0.70 | 0.69 | 0.71 | 0.69 | 0.72 | 0.70 |
| 12 | 121435475 | HNF1A    | rs2464195  | A | G | 0.65 | 0.63 | 0.66 | 0.63 | 0.66 | 0.64 |
| 12 | 121435587 | HNF1A    | rs2259816  | T | G | 0.65 | 0.63 | 0.66 | 0.66 | 0.66 | 0.64 |
| 12 | 121438311 | HNF1A    | rs1169306  | T | C | 0.65 | 0.63 | 0.66 | 0.63 | 0.66 | 0.64 |
| 12 | 121438844 | HNF1A    | rs735396   | C | T | 0.65 | 0.63 | 0.66 | 0.63 | 0.66 | 0.64 |
| 12 | 121439192 | HNF1A    | rs1169309  | T | G | 0.65 | 0.63 | 0.66 | 0.66 | 0.66 | 0.64 |
| 12 | 121439433 | HNF1A    | rs1169310  | A | G | 0.65 | 0.63 | 0.66 | 0.63 | 0.66 | 0.64 |
| 12 | 121440731 | C12orf43 | rs1169311  | T | C | 0.65 | 0.63 | 0.66 | 0.63 | 0.66 | 0.64 |
| 12 | 121441461 | C12orf43 | rs1169312  | T | G | 0.65 | 0.63 | 0.66 | 0.63 | 0.66 | 0.64 |
| 12 | 121442670 | C12orf43 | rs1169313  | C | T | 0.65 | 0.63 | 0.65 | 0.63 | 0.66 | 0.64 |
| 12 | 121445808 | C12orf43 | rs2257962  | C | T | 0.65 | 0.63 | 0.65 | 0.63 | 0.66 | 0.64 |
| 12 | 121450384 | C12orf43 | rs2254971  | C | C | 0.63 | 0.61 | 0.64 | 0.60 | 0.63 | 0.62 |
| 12 | 121454622 | C12orf43 | rs1182933  | T | C | 0.70 | 0.69 | 0.71 | 0.69 | 0.72 | 0.70 |
| 19 | 45411941  | APOE     | rs429358   | C | T | 0.85 | 0.87 | 0.87 | NA   | 0.87 | 0.86 |
| 22 | 22190785  | MAPK1    | rs56398890 | A | T | 0.58 | 0.56 | 0.56 | 0.53 | 0.57 | 0.56 |
| 22 | 22202164  | MAPK1    | rs9607320  | T | C | 0.59 | 0.58 | 0.57 | 0.53 | 0.58 | 0.57 |

Alt, alternative; Chr, chromosome; GWA, genome-wide association; Ref, reference; SNP, single-nucleotide polymorphism. †GRCh 37 coordinated.

**Table S1B.** Allele frequencies (total n=10,798) of the 65 SNPs associated with pro-inflammatory phenotypes from other GWA studies

| Chr | Positions† | Gene        | SNP        | Allele |     | Alt Allele Frequency |         |           |           |         |         |
|-----|------------|-------------|------------|--------|-----|----------------------|---------|-----------|-----------|---------|---------|
|     |            |             |            |        |     | AS264                | Garnet  | Geccocyto | Geccoinit | Hipfx   | Whims   |
|     |            |             |            | Ref    | Alt | n=1,603              | n=2,382 | n=1,177   | n=216     | n=1,909 | n=3,511 |
| 1   | 27180088   | ZDHHC18     | rs75460349 | A      | C   | 0.02                 | 0.03    | 0.02      | 0.02      | 0.03    | 0.02    |
| 1   | 40036847   | PABPC4      | rs2293476  | G      | C   | 0.21                 | 0.22    | 0.24      | 0.25      | 0.23    | 0.23    |
| 1   | 40064961   | PABPC4/HEYL | rs12037222 | G      | A   | NA                   | 0.22    | 0.24      | 0.24      | 0.23    | 0.23    |
| 1   | 66085574   | LEPR        | rs3790439  | A      | T   | 0.63                 | 0.63    | 0.62      | 0.67      | 0.63    | 0.63    |
| 1   | 66102257   | LEPR        | rs1805096  | A      | G   | 0.63                 | 0.62    | 0.62      | 0.67      | 0.63    | 0.63    |
| 1   | 66161461   | LEPR        | rs4420065  | T      | C   | 0.63                 | 0.62    | 0.62      | 0.68      | 0.63    | 0.63    |
| 1   | 91530305   | ZNF644      | rs469772   | C      | T   | 0.20                 | 0.20    | 0.19      | 0.19      | 0.18    | 0.19    |
| 1   | 154426264  | IL6R        | rs4129267  | C      | T   | 0.41                 | 0.40    | 0.41      | 0.40      | 0.40    | 0.41    |
| 1   | 154426970  | IL6R        | rs2228145  | A      | C   | 0.41                 | 0.40    | 0.41      | 0.40      | 0.41    | 0.41    |
| 1   | 159683438  | CRP         | rs1800947  | C      | G   | 0.06                 | 0.06    | NA        | 0.06      | 0.06    | 0.05    |



Inflammatory genetic markers and CRC: post-GWAS RSF

|    |           |          |            |   |   |      |      |      |      |      |      |
|----|-----------|----------|------------|---|---|------|------|------|------|------|------|
| 1  | 159684186 | CRP      | rs1417938  | T | A | 0.30 | 0.31 | 0.31 | 0.32 | 0.32 | 0.32 |
| 1  | 247601595 | NLRP3    | rs12239046 | C | T | 0.37 | 0.37 | 0.38 | 0.36 | 0.37 | 0.37 |
| 1  | 247612562 | NLRP3    | rs10925027 | C | T | 0.40 | 0.40 | NA   | 0.42 | 0.40 | 0.39 |
| 2  | 629881    | TMEM18   | rs12995480 | C | T | 0.17 | 0.18 | 0.18 | 0.17 | 0.17 | 0.18 |
| 2  | 27730940  | GCKR     | rs1260326  | C | T | 0.41 | 0.41 | 0.41 | NA   | 0.41 | 0.40 |
| 2  | 88438050  | FABP1    | rs4246598  | C | A | 0.45 | 0.46 | 0.45 | 0.47 | 0.45 | 0.46 |
| 2  | 102744854 | IL1R1    | rs9284725  | A | C | 0.24 | 0.25 | 0.23 | 0.25 | 0.25 | 0.25 |
| 2  | 113838145 | IL1F10   | rs13409371 | G | A | 0.39 | 0.39 | 0.41 | 0.43 | 0.39 | 0.40 |
| 2  | 113841030 | IL1F10   | rs6734238  | A | G | 0.40 | 0.40 | 0.42 | 0.44 | 0.40 | 0.40 |
| 2  | 214033530 | IKZF2    | rs1441169  | G | A | 0.49 | 0.49 | 0.48 | 0.50 | 0.48 | 0.48 |
| 3  | 49891885  | TRAIP    | rs2352975  | C | T | NA   | 0.69 | NA   | 0.70 | 0.69 | 0.69 |
| 3  | 170705693 | EIF5A2   | rs1514895  | A | G | 0.30 | 0.30 | 0.30 | 0.27 | 0.28 | 0.29 |
| 5  | 131839618 | IRF1     | rs4705952  | A | G | 0.25 | NA   | 0.27 | 0.24 | 0.25 | 0.24 |
| 5  | 172191052 | DUSP1    | rs17658229 | T | C | 0.04 | NA   | 0.04 | 0.03 | 0.04 | 0.04 |
| 6  | 116314634 | FRK      | rs12202641 | C | T | 0.41 | NA   | 0.41 | 0.41 | 0.40 | 0.41 |
| 6  | 117114025 | GPRC6A   | rs6901250  | G | A | 0.33 | 0.32 | 0.32 | 0.32 | 0.33 | 0.31 |
| 6  | 126851160 | CENPW    | rs1490384  | T | C | 0.49 | 0.51 | 0.51 | 0.54 | 0.47 | 0.49 |
| 6  | 130371227 | L3MBTL3  | rs9385532  | C | T | 0.33 | 0.31 | 0.31 | 0.33 | 0.32 | 0.33 |
| 7  | 22759469  | IL6      | rs1880241  | G | A | 0.52 | 0.52 | 0.50 | 0.52 | 0.51 | 0.51 |
| 7  | 22766645  | IL6      | rs1800795  | G | C | 0.43 | 0.43 | 0.41 | 0.40 | 0.43 | 0.44 |
| 7  | 36084529  | EEDP1    | rs2710804  | T | C | 0.37 | 0.36 | 0.39 | 0.38 | 0.38 | 0.38 |
| 7  | 72971231  | BCL7B    | rs13233571 | C | T | 0.11 | 0.13 | 0.11 | 0.13 | 0.12 | 0.12 |
| 8  | 9183358   | PPP1R3B  | rs9987289  | G | A | 0.09 | 0.09 | 0.08 | 0.08 | 0.09 | 0.09 |
| 8  | 9183596   | PPP1R3B  | rs4841132  | G | A | 0.09 | 0.09 | 0.08 | 0.08 | 0.09 | 0.09 |
| 8  | 117007850 | TRPS1    | rs2064009  | T | C | 0.42 | 0.43 | 0.40 | 0.39 | 0.41 | 0.41 |
| 8  | 126344208 | NSMCE2   | rs2891677  | C | T | 0.55 | 0.54 | 0.54 | 0.57 | 0.55 | 0.55 |
| 9  | 136142355 | ABO      | rs643434   | G | A | 0.36 | 0.37 | 0.35 | 0.31 | 0.35 | 0.35 |
| 10 | 91007360  | LIPA     | rs1051338  | T | G | 0.30 | 0.30 | 0.29 | 0.28 | 0.30 | 0.29 |
| 11 | 13357183  | ARNTL    | rs10832027 | A | G | 0.32 | 0.32 | 0.31 | 0.36 | 0.32 | 0.32 |
| 11 | 47312892  | MADD     | rs10838687 | T | G | 0.21 | 0.21 | 0.20 | 0.23 | 0.21 | 0.20 |
| 11 | 60021948  | MS4A4A   | rs1582763  | G | A | 0.36 | 0.38 | 0.35 | 0.39 | 0.36 | 0.38 |
| 11 | 72496148  | STARD10  | rs7121935  | G | A | 0.34 | 0.37 | 0.38 | NA   | 0.38 | 0.38 |
| 12 | 95855385  | METAP2   | rs11108056 | C | G | 0.44 | 0.43 | NA   | 0.44 | 0.46 | 0.43 |
| 12 | 103483094 | ASCL1    | rs10745954 | G | A | 0.52 | 0.52 | 0.50 | 0.55 | 0.51 | 0.52 |
| 12 | 103537266 | C12orf42 | rs10778215 | A | T | 0.53 | 0.53 | 0.53 | 0.58 | 0.52 | 0.53 |

### Inflammatory genetic markers and CRC: post-GWAS RSF

|    |          |                    |             |   |   |      |      |      |      |      |      |
|----|----------|--------------------|-------------|---|---|------|------|------|------|------|------|
| 14 | 73011885 | RGS6               | rs2239222   | A | G | 0.36 | 0.36 | 0.34 | NA   | 0.36 | 0.35 |
| 14 | 94838142 | SERPINA1/SERPINA2P | rs112635299 | G | T | 0.02 | 0.02 | 0.02 | 0.03 | 0.02 | 0.02 |
| 15 | 51745277 | DMXL2              | rs4774590   | G | A | 0.38 | 0.37 | 0.39 | 0.35 | 0.38 | 0.39 |
| 15 | 53728154 | WDR72              | rs1189402   | A | G | 0.37 | 0.37 | 0.39 | 0.38 | 0.36 | 0.38 |
| 15 | 60878030 | RORA               | rs340005    | A | G | 0.38 | 0.37 | 0.37 | 0.38 | 0.39 | 0.38 |
| 15 | 60894965 | RORA               | rs340029    | T | C | 0.39 | 0.37 | 0.37 | 0.38 | 0.39 | 0.37 |
| 16 | 53803574 | FTO                | rs1558902   | T | A | 0.39 | 0.41 | 0.40 | 0.42 | 0.40 | 0.40 |
| 17 | 16097430 | NCOR1              | rs178810    | C | T | NA   | 0.56 | 0.57 | 0.57 | 0.57 | 0.56 |
| 17 | 72699833 | CD300LF/RAB37      | rs10512597  | C | T | 0.19 | 0.19 | 0.18 | 0.16 | 0.18 | 0.19 |
| 18 | 12821593 | PTPN2              | rs2847281   | A | G | 0.39 | 0.39 | 0.38 | 0.39 | 0.40 | 0.40 |
| 18 | 12841176 | PTPN2              | rs2852151   | G | A | 0.39 | 0.39 | 0.38 | 0.39 | 0.40 | 0.40 |
| 18 | 55080437 | ONECUT2            | rs4092465   | A | G | 0.62 | 0.63 | NA   | NA   | 0.65 | 0.64 |
| 18 | 57897803 | MC4R               | rs12960928  | T | C | 0.26 | 0.26 | 0.26 | 0.26 | 0.27 | 0.27 |
| 19 | 45395714 | TOMM40             | rs157581    | T | C | NA   | 0.21 | 0.21 | NA   | 0.20 | 0.21 |
| 19 | 45396144 | TOMM40             | rs11556505  | C | T | 0.13 | 0.13 | 0.12 | NA   | 0.12 | 0.14 |
| 19 | 45396219 | TOMM40             | rs157582    | C | T | 0.23 | 0.21 | 0.20 | NA   | 0.20 | 0.21 |
| 20 | 43042364 | HNF4A              | rs1800961   | C | T | 0.03 | 0.03 | NA   | 0.04 | 0.03 | 0.03 |
| 20 | 62343956 | ZGPAT              | rs2315008   | G | T | 0.31 | 0.32 | 0.32 | 0.30 | 0.31 | 0.33 |
| 21 | 40465534 | PSMG1              | rs2836878   | G | A | 0.27 | 0.27 | 0.25 | 0.28 | 0.27 | 0.27 |
| 22 | 39074737 | TOMM22             | rs6001193   | A | G | NA   | 0.35 | 0.37 | 0.30 | 0.36 | 0.36 |

Alt, alternative; Chr, chromosome; GWA, genome-wide association; Ref, reference; SNP, single-nucleotide polymorphism. \*GRCh 37 coordinated.

## Inflammatory genetic markers and CRC: post-GWAS RSF

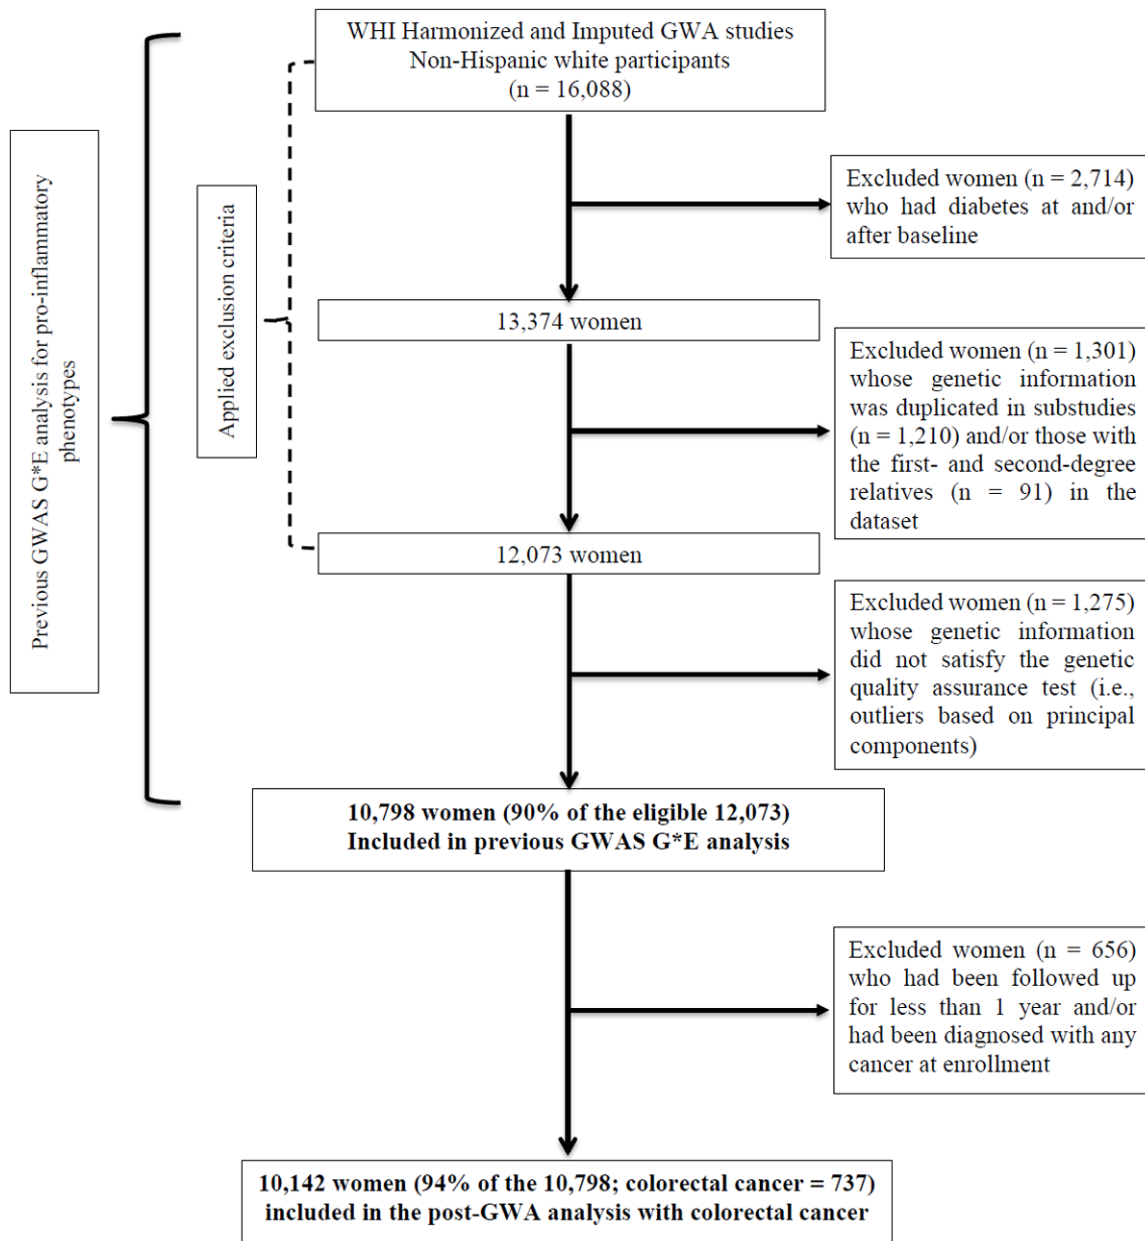

**Figure S2.** Flow diagram of analytic cohort derived from the previous GWA G×E interaction study. (G×E, gene-environment; GWAS, genome-wide association study; WHI, Women’s Health Initiative).

# Inflammatory genetic markers and CRC: post-GWAS RSF

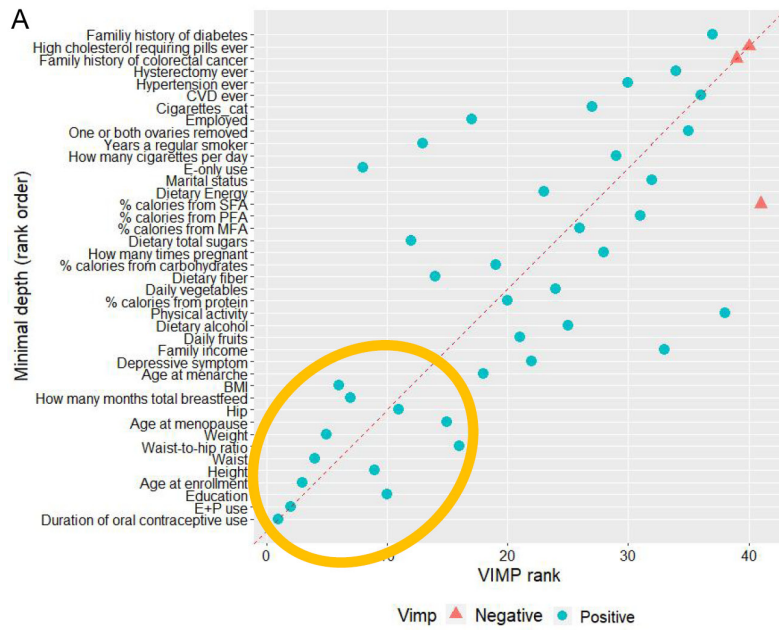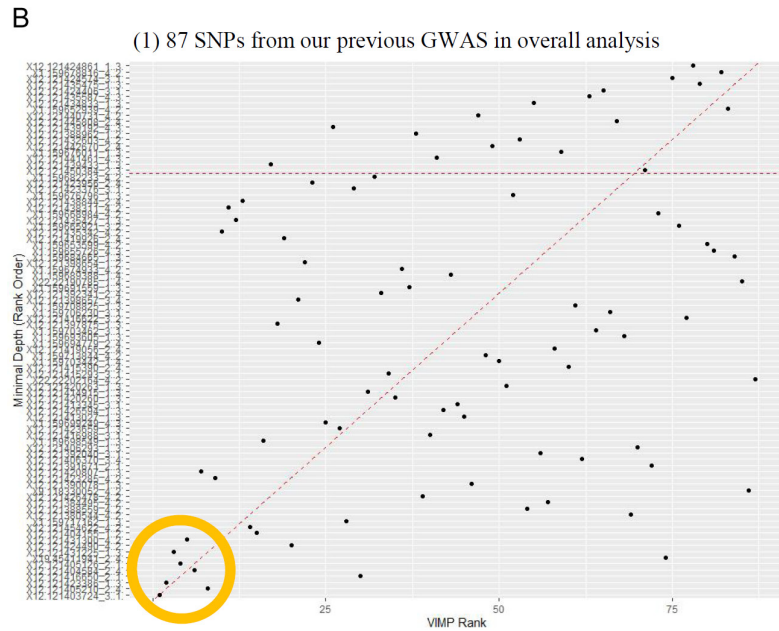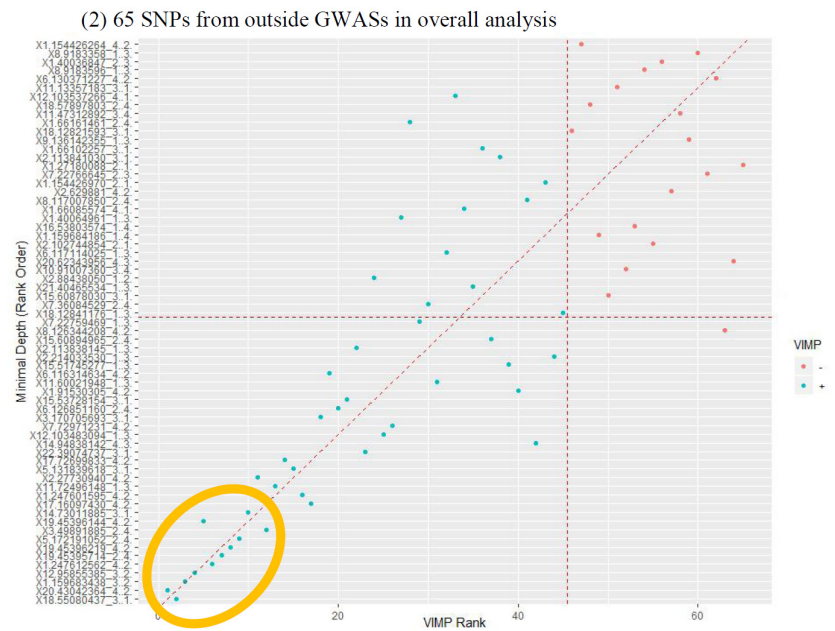

# Inflammatory genetic markers and CRC: post-GWAS RSF

C

(1) 49 SNPs from our previous GWAS in BMI < 30

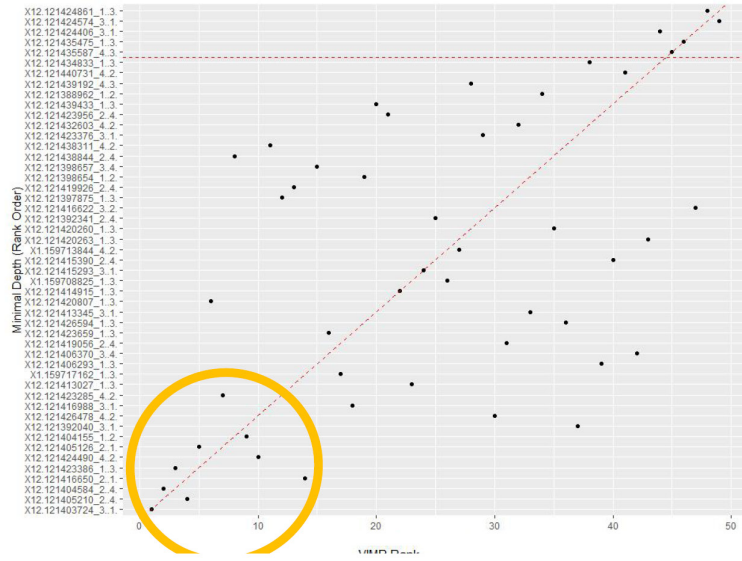

(2) 65 SNPs from outside GWASs in BMI < 30

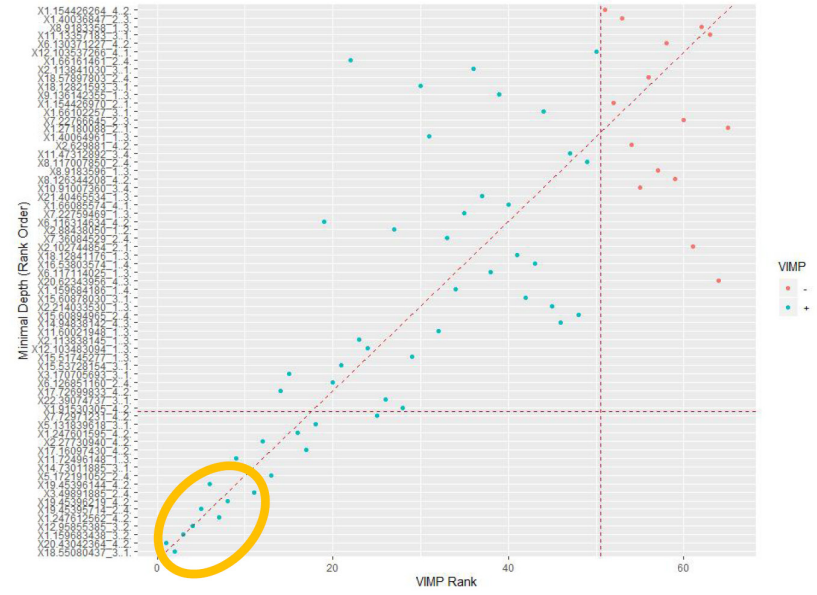

D

(1) 49 SNPs from our previous GWAS in BMI < 30

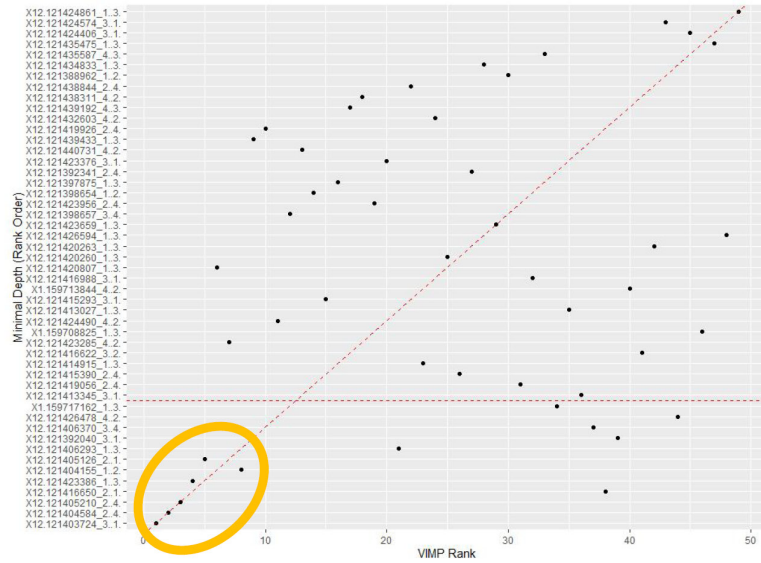

(2) 65 SNPs from outside GWASs in BMI ≥ 30

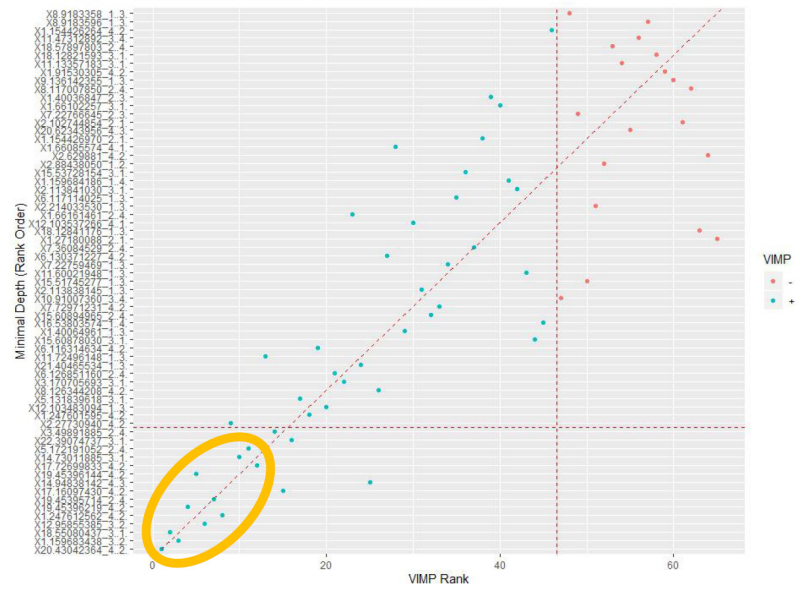



# Inflammatory genetic markers and CRC: post-GWAS RSF

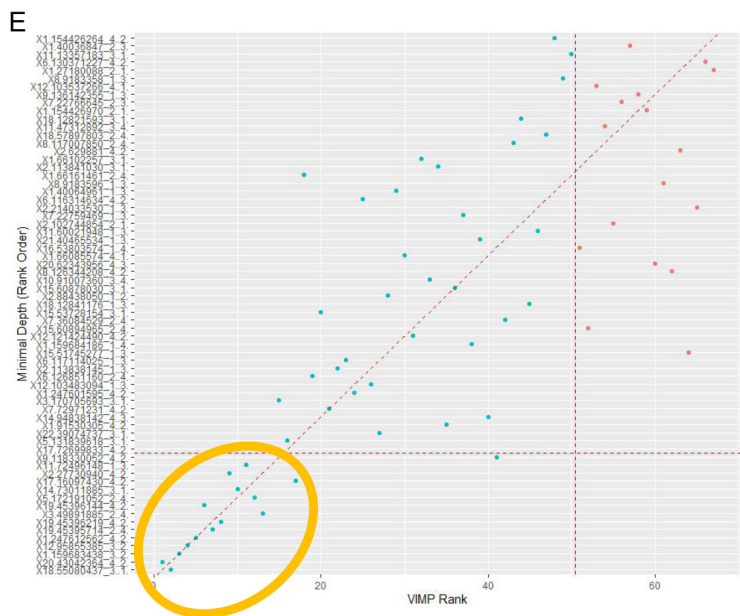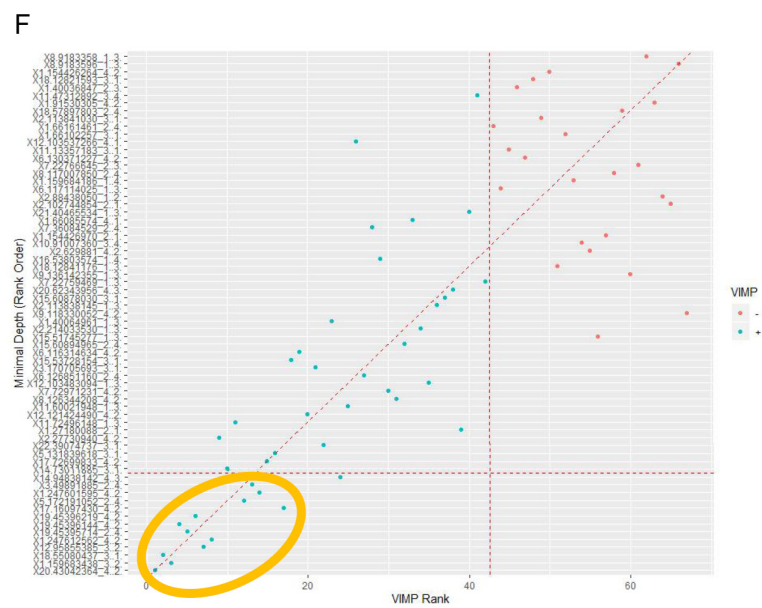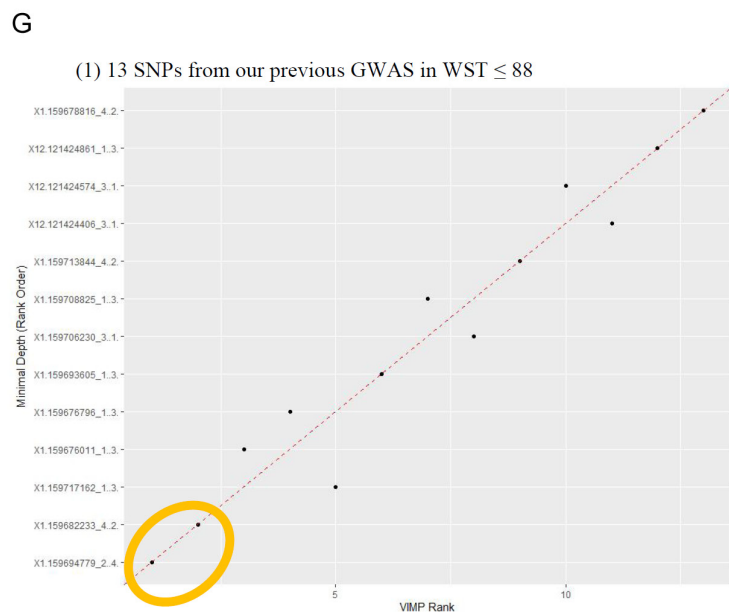

(2) 65 SNPs from outside GWASs in  $WST \leq 88$

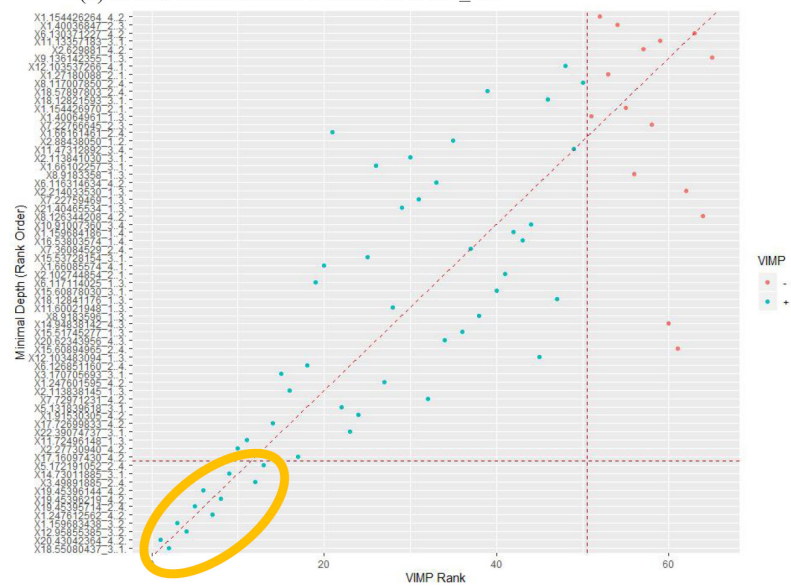

# Inflammatory genetic markers and CRC: post-GWAS RSF

H

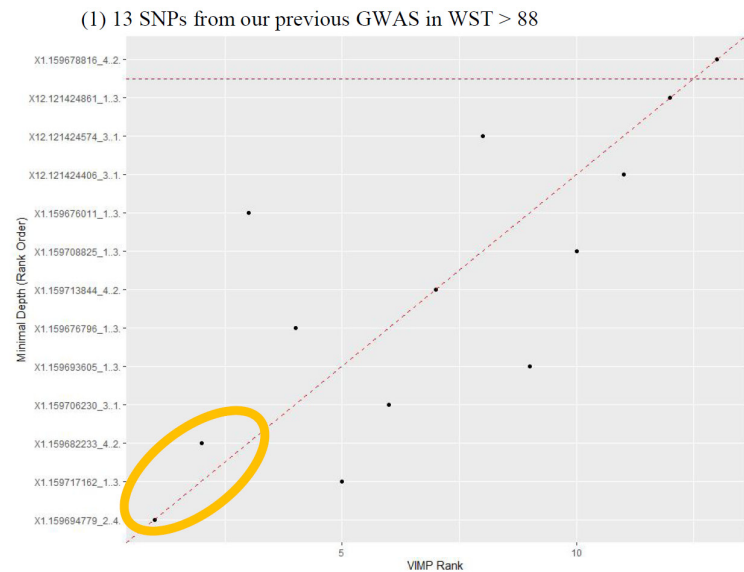

(2) 65 SNPs from outside GWASs in WST > 88

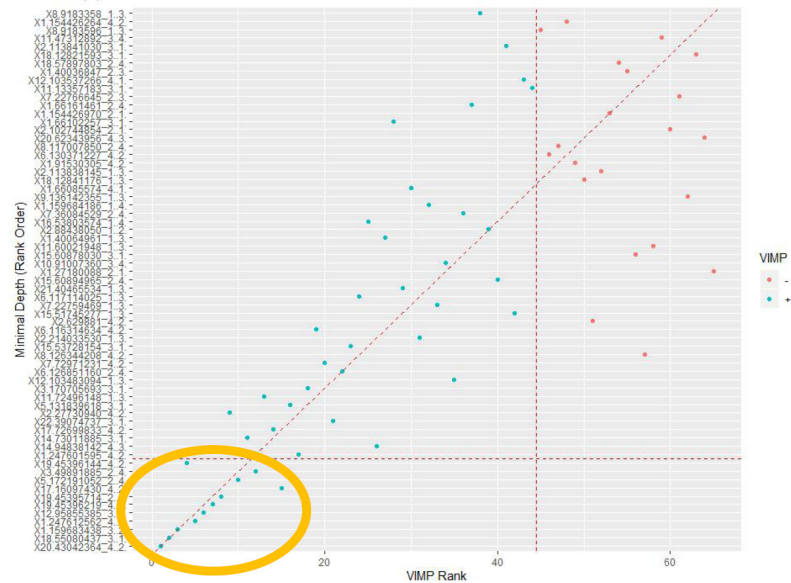

I

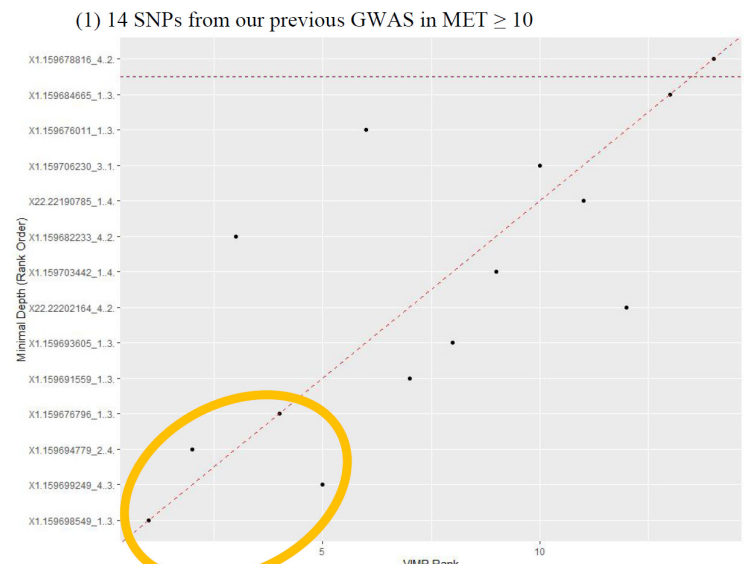

(2) 65 SNPs from outside GWASs in MET ≥ 10

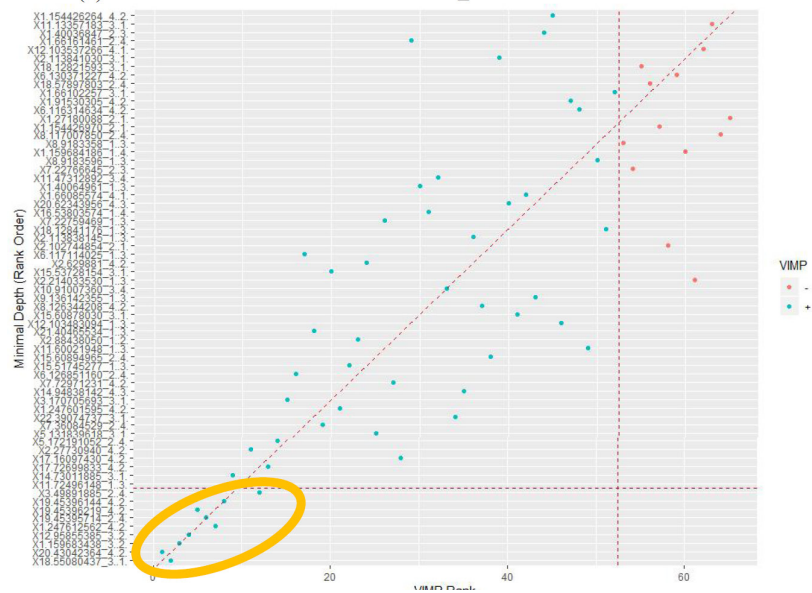

# Inflammatory genetic markers and CRC: post-GWAS RSF

J

(1) 14 SNPs from our previous GWAS in MET < 10

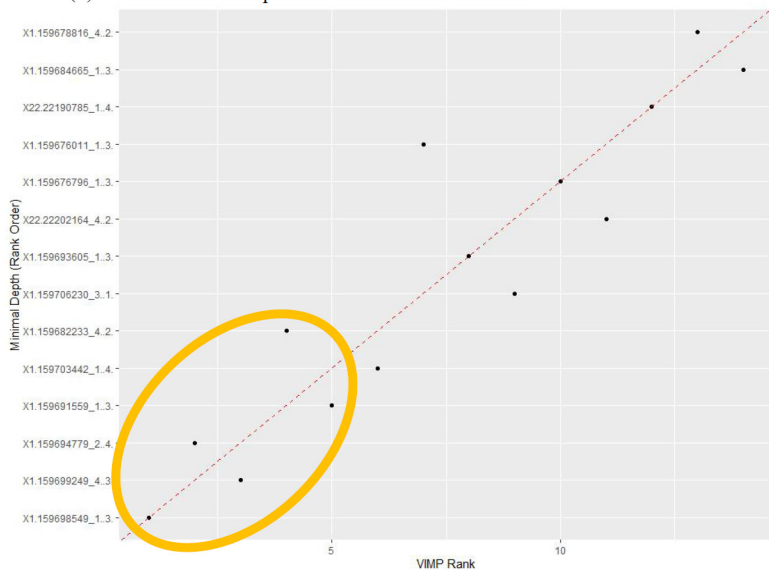

(2) 65 SNPs from outside GWASs in MET < 10

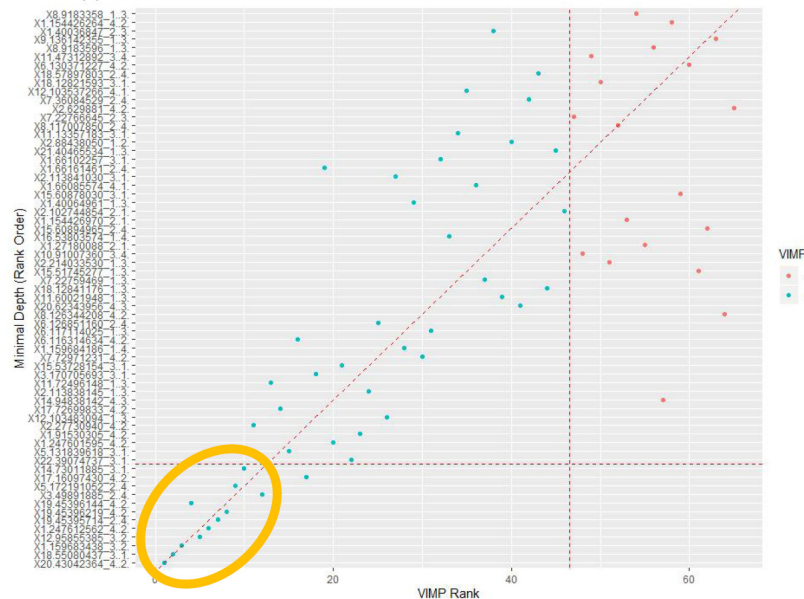

K

(1) 48 SNPs from our previous GWAS in SFA < 9.0

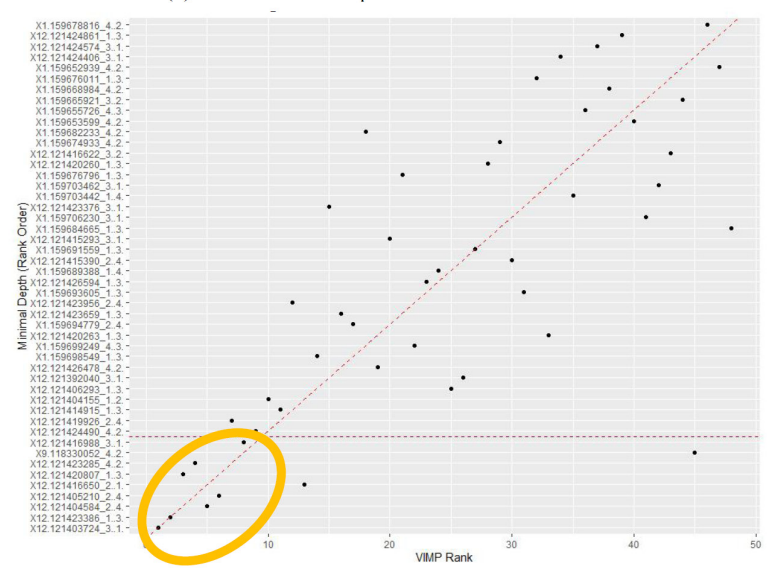

(2) 65 SNPs from outside GWASs in SFA < 9.0

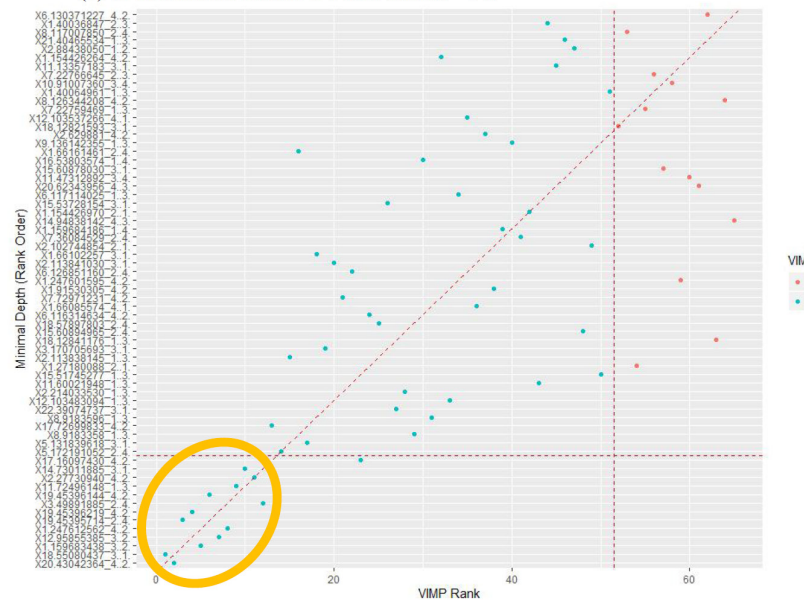



## Inflammatory genetic markers and CRC: post-GWAS RSF

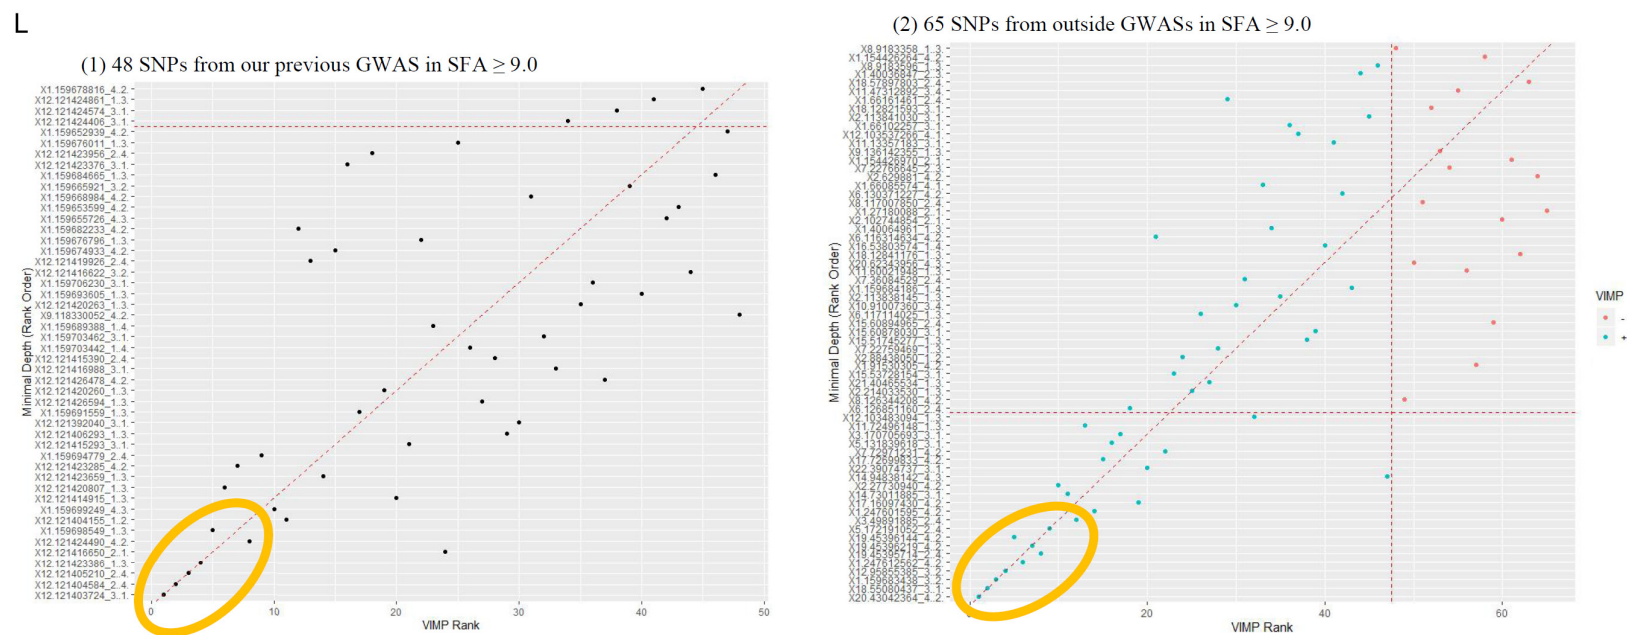

**Figure S3.** The first stage of random survival forest analysis, comparing minimal depth and VIMP rankings. A. Behavioral factors (BMI, body mass index; CVD, cardiovascular disease; E-only, exogenous estrogen; E+P, E + progestin; MFA, monounsaturated fatty acids; PFA, polyunsaturated fatty acids; SFA, saturated fatty acids; VIMP, variable of importance. Note: The 12 variables within the gold ellipse were identified as the most influential predictors). B. 152 (=87 + 65) SNPs in overall analysis (SNPs, single-nucleotide polymorphisms. Note: The 18 (=7 + 11) SNPs within the gold ellipses were identified as the most influential predictors). C. 114 (=49 + 65) SNPs in BMI-stratified analysis - non-obese group (BMI < 30) (BMI, body mass index. Note: The 18 (=9 + 9) SNPs within the gold ellipses were identified as the most influential predictors). D. 114 (=49 + 65) SNPs in BMI-stratified analysis - overall obese group (BMI  $\geq 30$ ) (Note: The 17 (=6 + 11) SNPs within the gold ellipses were identified as the most influential predictors). E. 67 SNPs (combining our 2 GWA SNPs and 65 SNPs from outside GWASs) in WHR-stratified analysis - non-viscerally obese group (WHR  $\leq 0.85$ ) (WHR, waist-to-hip ratio. Note: The 14 SNPs within the gold ellipse were identified as the most influential predictors). F. 67 SNPs (combining our 2 GWA SNPs and 65 SNPs from outside GWASs) in WHR-stratified analysis - viscerally obese group (WHR > 0.85) (Note: The 12 SNPs within the gold ellipse were identified as the most influential predictors). G. 78 (=13 + 65) SNPs in WST-stratified analysis - non-viscerally obese group (WST  $\leq 88$ ) (WST, waist circumference. Note: The 13 (=2 + 11) SNPs within the gold ellipses were identified as the most influential predictors). H. 78 (=13 + 65) SNPs in WST-stratified analysis - viscerally obese group (WST > 88) (Note: The 13 (=2 + 11) SNPs within the gold ellipses were identified as the most influential predictors). I. 79 (=14 + 65) SNPs in physical activity-stratified analysis - active group (MET  $\geq 10$ ) (MET, metabolic equivalent. Note: The 13 (=4 + 9) SNPs within the gold ellipses were identified as the most influential predictors). J. 79 (=14 + 65) SNPs in physical activity-stratified analysis - inactive group (MET < 10) (Note: The 16 (=5 + 11) SNPs within the gold ellipses were identified as the most influential predictors). K. 113 (=48 + 65) SNPs in SFA-stratified analysis - < 9.0% calories from SFA (SFA, saturated fatty acids. Note: The 19 (=7 + 12) SNPs within the gold ellipses were identified as the most influential predictors). L. 113 (=48 + 65) SNPs in SFA-stratified analysis -  $\geq 9.0\%$  calories from SFA (Note: The 16 (=6 + 10) SNPs within the gold ellipse were identified as the most influential predictors).

## Inflammatory genetic markers and CRC: post-GWAS RSF

**Table S2.** GMDR-based model for high-order gene-gene interactions in relation to CRC risk

| n | Model                                                                | TBA           | P Value       | CVC          |
|---|----------------------------------------------------------------------|---------------|---------------|--------------|
|   | <Overall>                                                            |               |               |              |
| 1 | <i>ONECUT2</i> rs4092465                                             | 0.6954        | 0.0010        | 10/10        |
| 2 | <i>ONECUT2</i> rs4092465 <i>HNF4A</i> rs1800961                      | <b>0.7019</b> | <b>0.0010</b> | <b>10/10</b> |
|   | <Non-overall obese group, BMI < 30 kg/m <sup>2</sup> >               |               |               |              |
| 1 | <i>ONECUT2</i> rs4092465                                             | 0.6933        | 0.0010        | 10/10        |
| 2 | <i>ONECUT2</i> rs4092465 <i>HNF4A</i> rs1800961                      | <b>0.6993</b> | <b>0.0010</b> | <b>10/10</b> |
|   | <Overall obese group, BMI ≥ 30 kg/m <sup>2</sup> >                   |               |               |              |
| 1 | <i>ONECUT2</i> rs4092465                                             | 0.7006        | 0.0010        | 10/10        |
| 2 | <i>ONECUT2</i> rs4092465 <i>HNF4A</i> rs1800961                      | <b>0.7084</b> | <b>0.0010</b> | <b>10/10</b> |
|   | <Non-viscerally obese group, WHR ≤ 0.85>                             |               |               |              |
| 1 | <i>ONECUT2</i> rs4092465                                             | 0.7010        | 0.0010        | 10/10        |
| 2 | <i>ONECUT2</i> rs4092465 <i>HNF4A</i> rs1800961                      | <b>0.7106</b> | <b>0.0010</b> | <b>10/10</b> |
|   | <Viscerally obese group, WHR > 0.85>                                 |               |               |              |
| 1 | <i>ONECUT2</i> rs4092465                                             | <b>0.6819</b> | <b>0.0010</b> | <b>10/10</b> |
| 2 | <i>ONECUT2</i> rs4092465 <i>HNF4A</i> rs1800961                      | 0.6769        | 0.0010        | 10/10        |
|   | <Non-viscerally obese group, WST ≤ 88 cm>                            |               |               |              |
| 1 | <i>ONECUT2</i> rs4092465                                             | 0.6943        | 0.0010        | 10/10        |
| 2 | <i>ONECUT2</i> rs4092465 <i>HNF4A</i> rs1800961                      | <b>0.7014</b> | <b>0.0010</b> | <b>10/10</b> |
|   | <Viscerally obese group, WST > 88 cm>                                |               |               |              |
| 1 | <i>ONECUT2</i> rs4092465                                             | 0.6970        | 0.0010        | 10/10        |
| 2 | <i>ONECUT2</i> rs4092465 <i>HNF4A</i> rs1800961                      | <b>0.7029</b> | <b>0.0010</b> | <b>10/10</b> |
|   | <Active group, MET ≥ 10.0>                                           |               |               |              |
| 1 | <i>ONECUT2</i> rs4092465                                             | 0.6925        | 0.0010        | 10/10        |
| 2 | <i>ONECUT2</i> rs4092465 <i>HNF4A</i> rs1800961                      | <b>0.7014</b> | <b>0.0010</b> | <b>10/10</b> |
|   | <Inactive group, MET < 10.0>                                         |               |               |              |
| 1 | <i>ONECUT2</i> rs4092465                                             | 0.6973        | 0.0010        | 10/10        |
| 2 | <i>ONECUT2</i> rs4092465 <i>HNF4A</i> rs1800961                      | <b>0.7009</b> | <b>0.0010</b> | <b>10/10</b> |
|   | <Low-fat diet group, % cal. from SFA < 9.0>                          |               |               |              |
| 1 | <i>ONECUT2</i> rs4092465                                             | 0.7061        | 0.0010        | 10/10        |
| 2 | <i>ONECUT2</i> rs4092465 <i>HNF4A</i> rs1800961                      | <b>0.7135</b> | <b>0.0010</b> | <b>10/10</b> |
| 3 | <i>ONECUT2</i> rs4092465 <i>HNF4A</i> rs1800961 <i>CRP</i> rs1800947 | 0.7094        | 0.0010        | 10/10        |
|   | <High-fat diet group, % cal. from SFA ≥ 9.0>                         |               |               |              |
| 1 | <i>ONECUT2</i> rs4092465                                             | 0.6922        | 0.0010        | 10/10        |
| 2 | <i>ONECUT2</i> rs4092465 <i>HNF4A</i> rs1800961                      | <b>0.6984</b> | <b>0.0010</b> | <b>10/10</b> |

BMI, body mass index; CRC, colorectal cancer; CVC, cross-validation consistency; GMDR, generalized multifactor dimensionality reduction; MET, metabolic equivalent; SFA, saturated fatty acids; TBA, testing balance accuracy; WHR, waist-to-hip ratio; WST, waist circumference. Models in bold face are considered the best, with the highest TBA, 10/10 CVC, and  $p < 0.05$ .

## Inflammatory genetic markers and CRC: post-GWAS RSF

**Table S3A.** The second stage of random survival forest analysis: predictive value of variables in non-overall obese group (BMI < 30 kg/m<sup>2</sup>)

| Variable*                          | Minimal Depth† | VIMP    | C-index | Error‡ | Drop Error§ |
|------------------------------------|----------------|---------|---------|--------|-------------|
| Duration of oral contraceptive use | 1.8458         | 0.0472  | 0.8617  | 0.1383 | 0.3617      |
| <i>HNF4A</i> rs1800961             | 2.7410         | 0.0259  | 0.9332  | 0.0668 | 0.0715      |
| <i>ONECUT2</i> rs4092465           | 2.8580         | 0.0171  | 0.9532  | 0.0468 | 0.0201      |
| <i>CRP</i> rs1800947               | 3.0740         | 0.0117  | 0.9523  | 0.0477 | -0.0010     |
| <i>METAP2</i> rs11108056           | 3.3444         | 0.0107  | 0.9556  | 0.0444 | 0.0034      |
| <i>NLRP3</i> rs10925027            | 3.6380         | 0.0076  | 0.9585  | 0.0415 | 0.0029      |
| <i>TOMM40</i> rs157581             | 4.0532         | 0.0120  | 0.9569  | 0.0431 | -0.0016     |
| <i>TOMM40</i> rs157582             | 4.2028         | 0.0091  | 0.9572  | 0.0428 | 0.0004      |
| <i>TRAIP</i> s2352975              | 4.4012         | 0.0027  | 0.9585  | 0.0415 | 0.0013      |
| Age at enrollment                  | 4.6002         | 0.0017  | 0.9597  | 0.0403 | 0.0011      |
| <i>TOMM40</i> rs11556505           | 4.8112         | 0.0113  | 0.9598  | 0.0402 | 0.0001      |
| Waist circumference                | 5.2336         | 0.0001  | 0.9597  | 0.0403 | -0.0001     |
| Hip circumference                  | 5.2418         | -0.0001 | 0.9592  | 0.0408 | -0.0005     |
| Waist-to-hip ratio                 | 5.3210         | 0.0001  | 0.9593  | 0.0407 | 0.0001      |
| Age at menopause                   | 5.3436         | 0.0003  | 0.9598  | 0.0402 | 0.0005      |
| <i>HNF1A</i> rs1169288             | 5.3498         | 0.0018  | 0.9587  | 0.0413 | -0.0012     |
| Duration of E+P use                | 5.4476         | 0.0007  | 0.9606  | 0.0394 | 0.0019      |
| <i>HNF1A</i> rs11065385            | 5.5488         | 0.0056  | 0.9602  | 0.0398 | -0.0004     |
| Total months of breastfeeding      | 5.6758         | 0.0003  | 0.9589  | 0.0411 | -0.0012     |
| Height                             | 5.6878         | -0.0002 | 0.9585  | 0.0415 | -0.0004     |
| <i>HNF1A</i> rs11065384            | 5.7466         | 0.0057  | 0.9583  | 0.0417 | -0.0002     |
| <i>HNF1A-AS1</i> rs7135337         | 5.7714         | 0.0030  | 0.9575  | 0.0425 | -0.0007     |
| Weight                             | 5.9938         | -0.0001 | 0.9571  | 0.0429 | -0.0004     |
| <i>HNF1A</i> rs2243458             | 6.1380         | 0.0030  | 0.9565  | 0.0435 | -0.0006     |
| <i>HNF1A-AS1</i> rs2251468         | 6.1412         | 0.0058  | 0.9558  | 0.0442 | -0.0007     |
| Education                          | 6.3760         | -0.0001 | 0.9572  | 0.0428 | 0.0014      |
| <i>HNF1A-AS1</i> rs7953249         | 6.9202         | 0.0065  | 0.9570  | 0.0430 | -0.0002     |
| <i>HNF1A-AS1</i> rs10774579        | 7.2118         | 0.0032  | 0.9566  | 0.0434 | -0.0004     |
| <i>HNF1A-AS1</i> rs1920792         | 7.2578         | 0.0035  | 0.9555  | 0.0445 | -0.0011     |

BMI, body mass index; C-index, concordance index; E+P, exogenous estrogen + progestin; VIMP, variable of importance. \*Variables are ordered by minimal depth. †Predictive value of variable was assessed via minimal depth in the nested random survival forest models. A lower value is likely to have a greater impact on prediction. ‡The incremental error rate of each variable was estimated in the nested sequence of models starting with the top variable, followed by the model with the top 2 variables, then the model with the top 3 variables, and so on. For example, the 3<sup>rd</sup> error rate was estimated from the 3<sup>rd</sup> nested model (including the 1<sup>st</sup>, 2<sup>nd</sup>, and 3<sup>rd</sup> variables). §The drop error rate was estimated by the difference between the error rates from the nested models with a prior and the corresponding variable. For example, the drop error rate of the 2<sup>nd</sup> variable was estimated by the difference between the error rates from the 1<sup>st</sup> and 2<sup>nd</sup> nested models. The error rate for the null model is set at 0.5; thus, the drop error rate for the 1<sup>st</sup> variable was obtained by subtracting the error rate (0.3617) from 0.5.

## Inflammatory genetic markers and CRC: post-GWAS RSF

**Table S3B.** The second stage of random survival forest analysis: predictive value of variables in overall obese group (BMI  $\geq 30$  kg/m<sup>2</sup>)

| Variable*                          | Minimal Depth† | VIMP    | C-index | Error¶ | Drop Error§ |
|------------------------------------|----------------|---------|---------|--------|-------------|
| Duration of oral contraceptive use | 2.4382         | 0.0344  | 0.8249  | 0.1751 | 0.3249      |
| <i>HNF4A</i> rs1800961             | 2.9428         | 0.0334  | 0.9024  | 0.0976 | 0.0775      |
| <i>CRP</i> rs1800947               | 3.7300         | 0.0155  | 0.9022  | 0.0978 | -0.0002     |
| <i>ONECUT2</i> rs4092465           | 3.8762         | 0.0181  | 0.9373  | 0.0627 | 0.0351      |
| <i>METAP2</i> rs11108056           | 4.1160         | 0.0093  | 0.9383  | 0.0617 | 0.0010      |
| <i>NLRP3</i> rs10925027            | 4.4502         | 0.0068  | 0.9409  | 0.0591 | 0.0026      |
| <i>TOMM40</i> rs157582             | 5.2110         | 0.0125  | 0.9408  | 0.0592 | -0.0001     |
| <i>RGS6</i> rs2239222              | 5.3524         | 0.0035  | 0.9416  | 0.0584 | 0.0008      |
| <i>TOMM40</i> rs157581             | 5.3750         | 0.0103  | 0.9424  | 0.0576 | 0.0008      |
| Education                          | 5.5236         | -0.0005 | 0.9431  | 0.0569 | 0.0007      |
| <i>TOMM40</i> rs11556505           | 5.5752         | 0.0136  | 0.9471  | 0.0529 | 0.0040      |
| <i>DUSP1</i> rs17658229            | 5.6148         | 0.0038  | 0.9513  | 0.0487 | 0.0042      |
| <i>CD300LF/RAB37</i> rs10512597    | 5.7284         | 0.0015  | 0.9514  | 0.0486 | 0.0001      |
| Height                             | 5.8142         | -0.0001 | 0.9496  | 0.0504 | -0.0019     |
| Age at enrollment                  | 6.0544         | 0.0002  | 0.9466  | 0.0534 | -0.0030     |
| Age at menopause                   | 6.0706         | 0.0000  | 0.9456  | 0.0544 | -0.0010     |
| Hip circumference                  | 6.0802         | 0.0006  | 0.9479  | 0.0521 | 0.0023      |
| <i>HNF1A</i> rs11065385            | 6.2498         | 0.0033  | 0.9469  | 0.0531 | -0.0010     |
| Waist circumference                | 6.3752         | -0.0003 | 0.9462  | 0.0538 | -0.0008     |
| <i>HNF1A-AS1</i> rs7135337         | 6.3972         | 0.0030  | 0.9447  | 0.0553 | -0.0014     |
| Waist-to-hip ratio                 | 6.4432         | -0.0001 | 0.9427  | 0.0573 | -0.0021     |
| <i>HNF1A-AS1</i> rs7953249         | 6.4710         | 0.0080  | 0.9417  | 0.0583 | -0.0009     |
| <i>HNF1A-AS1</i> rs2251468         | 6.5062         | 0.0061  | 0.9391  | 0.0609 | -0.0027     |
| Weight                             | 6.7850         | -0.0006 | 0.9381  | 0.0619 | -0.0010     |
| Duration of E+P use                | 6.9146         | 0.0000  | 0.9381  | 0.0619 | 0.0000      |
| <i>HNF1A-AS1</i> rs1920792         | 7.8064         | 0.0026  | 0.9394  | 0.0606 | 0.0013      |
| <i>HNF1A-AS1</i> rs10774579        | 7.9144         | 0.0026  | 0.9402  | 0.0598 | 0.0008      |
| Total months of breastfeeding      | 8.0044         | 0.0000  | 0.9392  | 0.0608 | -0.0010     |

BMI, body mass index; C-index, concordance index; E+P, exogenous estrogen + progestin; VIMP, variable of importance. \*Variables are ordered by minimal depth. †Predictive value of variable was assessed via minimal depth in the nested random survival forest models. A lower value is likely to have a greater impact on prediction. ¶The incremental error rate of each variable was estimated in the nested sequence of models starting with the top variable, followed by the model with the top 2 variables, then the model with the top 3 variables, and so on. For example, the 3<sup>rd</sup> error rate was estimated from the 3<sup>rd</sup> nested model (including the 1<sup>st</sup>, 2<sup>nd</sup>, and 3<sup>rd</sup> variables). §The drop error rate was estimated by the difference between the error rates from the nested models with a prior and the corresponding variable. For example, the drop error rate of the 2<sup>nd</sup> variable was estimated by the difference between the error rates from the 1<sup>st</sup> and 2<sup>nd</sup> nested models. The error rate for the null model is set at 0.5; thus, the drop error rate for the 1<sup>st</sup> variable was obtained by subtracting the error rate (0.3249) from 0.5.

## Inflammatory genetic markers and CRC: post-GWAS RSF

**Table S3C.** The second stage of random survival forest analysis: predictive value of variables in non-viscerally obese group (waist-to-hip ratio  $\leq 0.85$ )

| Variable*                          | Minimal Depth† | VIMP    | C-index | Error¶ | Drop Error§ |
|------------------------------------|----------------|---------|---------|--------|-------------|
| Duration of oral contraceptive use | 1.9340         | 0.0409  | 0.8510  | 0.1490 | 0.3510      |
| <i>HNF4A</i> rs1800961             | 2.6618         | 0.0267  | 0.9326  | 0.0674 | 0.0817      |
| <i>ONECUT2</i> rs4092465           | 2.7684         | 0.0185  | 0.9540  | 0.0460 | 0.0214      |
| <i>CRP</i> rs1800947               | 3.1084         | 0.0124  | 0.9519  | 0.0481 | -0.0022     |
| <i>METAP2</i> rs11108056           | 3.3028         | 0.0101  | 0.9520  | 0.0480 | 0.0001      |
| <i>NLRP3</i> rs10925027            | 3.5750         | 0.0075  | 0.9551  | 0.0449 | 0.0032      |
| <i>TOMM40</i> rs157581             | 3.7964         | 0.0120  | 0.9556  | 0.0444 | 0.0005      |
| <i>TOMM40</i> rs157582             | 3.9188         | 0.0107  | 0.9562  | 0.0438 | 0.0006      |
| <i>TOMM40</i> rs11556505           | 4.3290         | 0.0132  | 0.9568  | 0.0432 | 0.0006      |
| <i>TRAIP</i> rs2352975             | 4.3390         | 0.0029  | 0.9597  | 0.0403 | 0.0030      |
| <i>DUSP1</i> rs17658229            | 4.4170         | 0.0038  | 0.9646  | 0.0354 | 0.0049      |
| Age at enrollment                  | 4.6750         | 0.0010  | 0.9649  | 0.0351 | 0.0003      |
| <i>NCOR1</i> rs178810              | 4.8928         | 0.0003  | 0.9640  | 0.0360 | -0.0010     |
| <i>RGS6</i> rs2239222              | 4.9694         | 0.0020  | 0.9627  | 0.0373 | -0.0013     |
| Duration of E+P use                | 5.0122         | 0.0011  | 0.9640  | 0.0360 | 0.0013      |
| Hip circumference                  | 5.0998         | -0.0002 | 0.9639  | 0.0361 | -0.0002     |
| <i>GCKR</i> rs1260326              | 5.1030         | 0.0029  | 0.9649  | 0.0351 | 0.0011      |
| Age at menopause                   | 5.1118         | 0.0004  | 0.9641  | 0.0359 | -0.0008     |
| Waist circumference                | 5.1856         | 0.0000  | 0.9642  | 0.0358 | 0.0002      |
| <i>STARD10</i> rs7121935           | 5.2054         | 0.0025  | 0.9629  | 0.0371 | -0.0014     |
| Height                             | 5.5332         | -0.0002 | 0.9629  | 0.0371 | 0.0000      |
| BMI                                | 5.5796         | -0.0002 | 0.9627  | 0.0373 | -0.0002     |
| Weight                             | 5.6600         | 0.0001  | 0.9614  | 0.0386 | -0.0013     |
| Education                          | 5.9200         | -0.0003 | 0.9605  | 0.0395 | -0.0009     |
| Total months of breastfeeding      | 6.6006         | 0.0000  | 0.9602  | 0.0398 | -0.0004     |

BMI, body mass index; C-index, concordance index; E+P, exogenous estrogen + progestin; VIMP, variable of importance. \*Variables are ordered by minimal depth. †Predictive value of variable was assessed via minimal depth in the nested random survival forest models. A lower value is likely to have a greater impact on prediction. ¶The incremental error rate of each variable was estimated in the nested sequence of models starting with the top variable, followed by the model with the top 2 variables, then the model with the top 3 variables, and so on. For example, the 3<sup>rd</sup> error rate was estimated from the 3<sup>rd</sup> nested model (including the 1<sup>st</sup>, 2<sup>nd</sup>, and 3<sup>rd</sup> variables). §The drop error rate was estimated by the difference between the error rates from the nested models with a prior and the corresponding variable. For example, the drop error rate of the 2<sup>nd</sup> variable was estimated by the difference between the error rates from the 1<sup>st</sup> and 2<sup>nd</sup> nested models. The error rate for the null model is set at 0.5; thus, the drop error rate for the 1<sup>st</sup> variable was obtained by subtracting the error rate (0.3510) from 0.5.

## Inflammatory genetic markers and CRC: post-GWAS RSF

**Table S3D.** The second stage of random survival forest analysis: predictive value of variables in viscerally obese group (waist-to-hip ratio > 0.85)

| Variable*                          | Minimal Depth† | VIMP    | C-index | Error¶ | Drop Error§ |
|------------------------------------|----------------|---------|---------|--------|-------------|
| Duration of oral contraceptive use | 2.1058         | 0.0563  | 0.8342  | 0.1658 | 0.3342      |
| <i>HNF4A</i> rs1800961             | 2.9236         | 0.0282  | 0.9160  | 0.0840 | 0.0818      |
| <i>CRP</i> rs1800947               | 3.0800         | 0.0157  | 0.9134  | 0.0866 | -0.0026     |
| <i>ONECUT2</i> rs4092465           | 3.4690         | 0.0226  | 0.9385  | 0.0615 | 0.0251      |
| <i>METAP2</i> rs11108056           | 4.0050         | 0.0085  | 0.9387  | 0.0613 | 0.0001      |
| <i>NLRP3</i> rs10925027            | 4.1224         | 0.0082  | 0.9379  | 0.0621 | -0.0008     |
| <i>TOMM40</i> rs157581             | 4.4910         | 0.0216  | 0.9361  | 0.0639 | -0.0018     |
| <i>TOMM40</i> rs11556505           | 4.5374         | 0.0255  | 0.9411  | 0.0589 | 0.0050      |
| <i>TOMM40</i> rs157582             | 4.8506         | 0.0176  | 0.9399  | 0.0601 | -0.0012     |
| Age at enrollment                  | 4.9918         | 0.0030  | 0.9435  | 0.0565 | 0.0037      |
| <i>DUSP1</i> rs17658229            | 5.0486         | 0.0038  | 0.9486  | 0.0514 | 0.0051      |
| <i>TRAIIP</i> rs2352975            | 5.1480         | 0.0017  | 0.9493  | 0.0507 | 0.0007      |
| <i>NLRP3</i> rs12239046            | 5.2114         | 0.0036  | 0.9497  | 0.0503 | 0.0004      |
| <i>NCOR1</i> rs178810              | 5.3192         | 0.0009  | 0.9482  | 0.0518 | -0.0015     |
| Education                          | 5.6916         | -0.0006 | 0.9466  | 0.0534 | -0.0017     |
| Height                             | 5.8588         | -0.0001 | 0.9447  | 0.0553 | -0.0019     |
| Weight                             | 6.0178         | -0.0003 | 0.9455  | 0.0545 | 0.0008      |
| Total months of breastfeeding      | 6.0396         | 0.0007  | 0.9456  | 0.0544 | 0.0001      |
| BMI                                | 6.0644         | -0.0002 | 0.9441  | 0.0559 | -0.0015     |
| Hip circumference                  | 6.2248         | 0.0002  | 0.9432  | 0.0568 | -0.0010     |
| Age at menopause                   | 6.2702         | -0.0005 | 0.9439  | 0.0561 | 0.0007      |
| Waist circumference                | 6.3782         | 0.0004  | 0.9418  | 0.0582 | -0.0021     |
| Duration of E+P use                | 7.3304         | -0.0001 | 0.9408  | 0.0592 | -0.0010     |

BMI, body mass index; C-index, concordance index; E+P, exogenous estrogen + progestin; VIMP, variable of importance. \*Variables are ordered by minimal depth. †Predictive value of variable was assessed via minimal depth in the nested random survival forest models. A lower value is likely to have a greater impact on prediction. ¶The incremental error rate of each variable was estimated in the nested sequence of models starting with the top variable, followed by the model with the top 2 variables, then the model with the top 3 variables, and so on. For example, the 3<sup>rd</sup> error rate was estimated from the 3<sup>rd</sup> nested model (including the 1<sup>st</sup>, 2<sup>nd</sup>, and 3<sup>rd</sup> variables). §The drop error rate was estimated by the difference between the error rates from the nested models with a prior and the corresponding variable. For example, the drop error rate of the 2<sup>nd</sup> variable was estimated by the difference between the error rates from the 1<sup>st</sup> and 2<sup>nd</sup> nested models. The error rate for the null model is set at 0.5; thus, the drop error rate for the 1<sup>st</sup> variable was obtained by subtracting the error rate (0.4251) from 0.5.

## Inflammatory genetic markers and CRC: post-GWAS RSF

**Table S3E.** The second stage of random survival forest analysis: predictive value of variables in non-viscerally obese group (waist circumference  $\leq$  88 cm)

| Variable*                          | Minimal Depth† | VIMP    | C-index | Error¶ | Drop Error§ |
|------------------------------------|----------------|---------|---------|--------|-------------|
| Duration of oral contraceptive use | 1.8380         | 0.0508  | 0.8749  | 0.1251 | 0.3749      |
| <i>ONECUT2</i> rs4092465           | 2.7844         | 0.0209  | 0.9479  | 0.0521 | 0.0730      |
| <i>HNF4A</i> rs1800961             | 2.8618         | 0.0234  | 0.9534  | 0.0466 | 0.0055      |
| <i>CRP</i> rs1800947               | 3.1218         | 0.0164  | 0.9534  | 0.0466 | -0.0001     |
| <i>METAP2</i> rs11108056           | 3.2872         | 0.0094  | 0.9537  | 0.0463 | 0.0004      |
| <i>NLRP3</i> rs10925027            | 3.5948         | 0.0069  | 0.9560  | 0.0440 | 0.0022      |
| <i>TOMM40</i> rs157581             | 3.8174         | 0.0162  | 0.9554  | 0.0446 | -0.0006     |
| <i>TOMM40</i> rs157582             | 3.9572         | 0.0136  | 0.9569  | 0.0431 | 0.0015      |
| <i>TOMM40</i> rs11556505           | 4.2854         | 0.0178  | 0.9568  | 0.0432 | -0.0001     |
| Age at enrollment                  | 4.4032         | 0.0015  | 0.9580  | 0.0420 | 0.0012      |
| <i>TRAIP</i> rs2352975             | 4.6390         | 0.0025  | 0.9592  | 0.0408 | 0.0013      |
| <i>RGS6</i> rs2239222              | 4.8606         | 0.0033  | 0.9592  | 0.0408 | -0.0001     |
| <i>DUSP1</i> rs17658229            | 4.8922         | 0.0034  | 0.9623  | 0.0377 | 0.0031      |
| Hip circumference                  | 5.3536         | -0.0002 | 0.9612  | 0.0388 | -0.0011     |
| Duration of E+P use                | 5.3606         | 0.0008  | 0.9617  | 0.0383 | 0.0005      |
| Age at menopause                   | 5.3786         | 0.0001  | 0.9614  | 0.0386 | -0.0004     |
| Waist-to-hip ratio                 | 5.5536         | -0.0002 | 0.9620  | 0.0380 | 0.0006      |
| Height                             | 5.5628         | -0.0003 | 0.9616  | 0.0384 | -0.0004     |
| <i>CRP</i> rs7551731               | 5.6326         | 0.0013  | 0.9611  | 0.0389 | -0.0005     |
| Education                          | 5.7548         | -0.0002 | 0.9602  | 0.0398 | -0.0008     |
| BMI                                | 5.8016         | -0.0001 | 0.9600  | 0.0400 | -0.0003     |
| Weight                             | 5.8430         | 0.0000  | 0.9588  | 0.0412 | -0.0011     |
| Total months of breastfeeding      | 5.9848         | 0.0001  | 0.9581  | 0.0419 | -0.0007     |
| <i>CRP</i> rs1205                  | 6.4662         | 0.0012  | 0.9576  | 0.0424 | -0.0005     |

BMI, body mass index; C-index, concordance index; E+P, exogenous estrogen + progestin; VIMP, variable of importance. \*Variables are ordered by minimal depth. †Predictive value of variable was assessed via minimal depth in the nested random survival forest models. A lower value is likely to have a greater impact on prediction. ¶The incremental error rate of each variable was estimated in the nested sequence of models starting with the top variable, followed by the model with the top 2 variables, then the model with the top 3 variables, and so on. For example, the 3<sup>rd</sup> error rate was estimated from the 3<sup>rd</sup> nested model (including the 1<sup>st</sup>, 2<sup>nd</sup>, and 3<sup>rd</sup> variables). §The drop error rate was estimated by the difference between the error rates from the nested models with a prior and the corresponding variable. For example, the drop error rate of the 2<sup>nd</sup> variable was estimated by the difference between the error rates from the 1<sup>st</sup> and 2<sup>nd</sup> nested models. The error rate for the null model is set at 0.5; thus, the drop error rate for the 1<sup>st</sup> variable was obtained by subtracting the error rate (0.3749) from 0.5.



## Inflammatory genetic markers and CRC: post-GWAS RSF

**Table S3F.** The second stage of random survival forest analysis: predictive value of variables in viscerally obese group (waist circumference > 88 cm)

| Variable*                          | Minimal Depth† | VIMP    | C-index | Error¶ | Drop Error§ |
|------------------------------------|----------------|---------|---------|--------|-------------|
| Duration of oral contraceptive use | 2.1864         | 0.0392  | 0.8140  | 0.1860 | 0.3140      |
| <i>HNF4A</i> rs1800961             | 2.5850         | 0.0300  | 0.9117  | 0.0883 | 0.0977      |
| <i>ONECUT2</i> rs4092465           | 3.1096         | 0.0206  | 0.9442  | 0.0558 | 0.0325      |
| <i>CRP</i> rs1800947               | 3.1376         | 0.0203  | 0.9410  | 0.0590 | -0.0032     |
| <i>METAP2</i> rs11108056           | 3.7004         | 0.0090  | 0.9425  | 0.0575 | 0.0015      |
| <i>NLRP3</i> rs10925027            | 3.7572         | 0.0086  | 0.9442  | 0.0558 | 0.0017      |
| <i>TOMM40</i> rs157581             | 4.2294         | 0.0170  | 0.9423  | 0.0577 | -0.0019     |
| <i>TOMM40</i> rs11556505           | 4.3040         | 0.0207  | 0.9483  | 0.0517 | 0.0061      |
| <i>TOMM40</i> rs157582             | 4.3952         | 0.0149  | 0.9473  | 0.0527 | -0.0010     |
| <i>TRAIP</i> rs2352975             | 4.5670         | 0.0029  | 0.9500  | 0.0500 | 0.0027      |
| <i>DUSP1</i> rs17658229            | 4.5686         | 0.0048  | 0.9560  | 0.0440 | 0.0060      |
| <i>NCOR1</i> rs178810              | 4.7188         | 0.0010  | 0.9551  | 0.0449 | -0.0009     |
| Waist-to-hip ratio                 | 5.2952         | 0.0008  | 0.9541  | 0.0459 | -0.0010     |
| Age at enrollment                  | 5.3224         | 0.0011  | 0.9525  | 0.0475 | -0.0016     |
| Hip circumference                  | 5.4536         | 0.0000  | 0.9512  | 0.0488 | -0.0013     |
| Weight                             | 5.4926         | -0.0001 | 0.9489  | 0.0511 | -0.0023     |
| <i>CRP</i> rs7551731               | 5.4994         | 0.0030  | 0.9506  | 0.0494 | 0.0017      |
| BMI                                | 5.5298         | 0.0001  | 0.9492  | 0.0508 | -0.0014     |
| Height                             | 5.6658         | 0.0003  | 0.9483  | 0.0517 | -0.0009     |
| Age at menopause                   | 5.6948         | 0.0003  | 0.9481  | 0.0519 | -0.0003     |
| Education                          | 5.8200         | -0.0003 | 0.9469  | 0.0531 | -0.0012     |
| Duration of E+P use                | 6.0930         | 0.0004  | 0.9473  | 0.0527 | 0.0004      |
| <i>CRP</i> rs1205                  | 6.5412         | 0.0022  | 0.9465  | 0.0535 | -0.0009     |
| Total months of breastfeeding      | 6.7822         | -0.0001 | 0.9452  | 0.0548 | -0.0013     |

BMI, body mass index; C-index, concordance index; E+P, exogenous estrogen + progestin; VIMP, variable of importance. \*Variables are ordered by minimal depth. †Predictive value of variable was assessed via minimal depth in the nested random survival forest models. A lower value is likely to have a greater impact on prediction. ¶The incremental error rate of each variable was estimated in the nested sequence of models starting with the top variable, followed by the model with the top 2 variables, then the model with the top 3 variables, and so on. For example, the 3<sup>rd</sup> error rate was estimated from the 3<sup>rd</sup> nested model (including the 1<sup>st</sup>, 2<sup>nd</sup>, and 3<sup>rd</sup> variables). §The drop error rate was estimated by the difference between the error rates from the nested models with a prior and the corresponding variable. For example, the drop error rate of the 2<sup>nd</sup> variable was estimated by the difference between the error rates from the 1<sup>st</sup> and 2<sup>nd</sup> nested models. The error rate for the null model is set at 0.5; thus, the drop error rate for the 1<sup>st</sup> variable was obtained by subtracting the error rate (0.3140) from 0.5.



## Inflammatory genetic markers and CRC: post-GWAS RSF

**Table S3G.** The second stage of random survival forest analysis: predictive value of variables in active group (MET  $\geq$  10.0)

| Variable*                          | Minimal Depth† | VIMP    | C-index | Error¶ | Drop Error§ |
|------------------------------------|----------------|---------|---------|--------|-------------|
| Duration of oral contraceptive use | 1.9696         | 0.0472  | 0.8663  | 0.1337 | 0.3664      |
| <i>ONECUT2</i> rs4092465           | 2.8608         | 0.0232  | 0.9467  | 0.0533 | 0.0803      |
| <i>HNF4A</i> rs1800961             | 3.0362         | 0.0250  | 0.9509  | 0.0491 | 0.0042      |
| <i>CRP</i> rs1800947               | 3.3198         | 0.0181  | 0.9534  | 0.0466 | 0.0025      |
| <i>TOMM40</i> rs157581             | 3.6268         | 0.0192  | 0.9550  | 0.0450 | 0.0017      |
| <i>METAP2</i> rs11108056           | 3.6452         | 0.0099  | 0.9551  | 0.0449 | 0.0001      |
| <i>TOMM40</i> rs157582             | 3.6524         | 0.0182  | 0.9547  | 0.0453 | -0.0004     |
| <i>NLRP3</i> rs10925027            | 3.9368         | 0.0073  | 0.9538  | 0.0462 | -0.0009     |
| <i>TOMM40</i> rs11556505           | 4.1794         | 0.0188  | 0.9531  | 0.0469 | -0.0007     |
| Age at enrollment                  | 4.6828         | 0.0020  | 0.9546  | 0.0454 | 0.0015      |
| <i>TRAIIP</i> rs2352975            | 4.7204         | 0.0021  | 0.9546  | 0.0454 | 0.0000      |
| Waist-to-hip ratio                 | 5.3104         | 0.0002  | 0.9542  | 0.0458 | -0.0004     |
| Hip circumference                  | 5.5046         | -0.0001 | 0.9530  | 0.0470 | -0.0012     |
| <i>CRP</i> rs4546916               | 5.6138         | 0.0018  | 0.9523  | 0.0477 | -0.0006     |
| <i>CRP</i> rs7553007               | 5.6618         | 0.0030  | 0.9516  | 0.0484 | -0.0008     |
| Duration of E+P use                | 5.7384         | 0.0005  | 0.9522  | 0.0478 | 0.0006      |
| Age at menopause                   | 5.8254         | 0.0005  | 0.9549  | 0.0451 | 0.0027      |
| <i>CRP</i> rs7551731               | 5.8472         | 0.0024  | 0.9544  | 0.0456 | -0.0005     |
| Height                             | 5.9668         | 0.0001  | 0.9539  | 0.0461 | -0.0005     |
| Waist circumference                | 6.0430         | -0.0002 | 0.9531  | 0.0469 | -0.0008     |
| Weight                             | 6.0468         | 0.0000  | 0.9520  | 0.0480 | -0.0012     |
| BMI                                | 6.0648         | 0.0000  | 0.9515  | 0.0485 | -0.0005     |
| Education                          | 6.3488         | 0.0002  | 0.9508  | 0.0492 | -0.0007     |
| Total months of breastfeeding      | 6.6838         | 0.0000  | 0.9507  | 0.0493 | -0.0001     |
| <i>CRPP1</i> rs2808629             | 6.6970         | 0.0015  | 0.9497  | 0.0503 | -0.0010     |

BMI, body mass index; C-index, concordance index; E+P, exogenous estrogen + progestin; VIMP, variable of importance. \*Variables are ordered by minimal depth. †Predictive value of variable was assessed via minimal depth in the nested random survival forest models. A lower value is likely to have a greater impact on prediction. ¶The incremental error rate of each variable was estimated in the nested sequence of models starting with the top variable, followed by the model with the top 2 variables, then the model with the top 3 variables, and so on. For example, the 3<sup>rd</sup> error rate was estimated from the 3<sup>rd</sup> nested model (including the 1<sup>st</sup>, 2<sup>nd</sup>, and 3<sup>rd</sup> variables). §The drop error rate was estimated by the difference between the error rates from the nested models with a prior and the corresponding variable. For example, the drop error rate of the 2<sup>nd</sup> variable was estimated by the difference between the error rates from the 1<sup>st</sup> and 2<sup>nd</sup> nested models. The error rate for the null model is set at 0.5; thus, the drop error rate for the 1<sup>st</sup> variable was obtained by subtracting the error rate (0.3664) from 0.5.

## Inflammatory genetic markers and CRC: post-GWAS RSF

**Table S3H.** The second stage of random survival forest analysis: predictive value of variables in inactive group (MET < 10.0)

| Variable*                          | Minimal Depth† | VIMP    | C-index | Error¶ | Drop Error§ |
|------------------------------------|----------------|---------|---------|--------|-------------|
| Duration of oral contraceptive use | 1.9854         | 0.0442  | 0.8406  | 0.1594 | 0.3406      |
| <i>HNF4A</i> rs1800961             | 2.6084         | 0.0284  | 0.9229  | 0.0771 | 0.0823      |
| <i>CRP</i> rs1800947               | 2.9872         | 0.0218  | 0.9222  | 0.0778 | -0.0007     |
| <i>ONECUT2</i> rs4092465           | 3.0140         | 0.0195  | 0.9514  | 0.0486 | 0.0292      |
| <i>METAP2</i> rs11108056           | 3.5080         | 0.0085  | 0.9487  | 0.0513 | -0.0026     |
| <i>NLRP3</i> rs10925027            | 3.8052         | 0.0073  | 0.9510  | 0.0490 | 0.0023      |
| <i>TOMM40</i> rs11556505           | 4.2900         | 0.0202  | 0.9531  | 0.0469 | 0.0021      |
| <i>TOMM40</i> rs157581             | 4.3890         | 0.0164  | 0.9549  | 0.0451 | 0.0018      |
| <i>TOMM40</i> rs157582             | 4.4968         | 0.0126  | 0.9552  | 0.0448 | 0.0004      |
| <i>TRAIP</i> rs2352975             | 4.7224         | 0.0024  | 0.9581  | 0.0419 | 0.0029      |
| <i>DUSP1</i> rs17658229            | 4.7960         | 0.0041  | 0.9640  | 0.0360 | 0.0059      |
| Age at enrollment                  | 4.8076         | 0.0012  | 0.9640  | 0.0360 | 0.0000      |
| Age at menopause                   | 5.3608         | 0.0000  | 0.9637  | 0.0363 | -0.0003     |
| <i>RGS6</i> rs2239222              | 5.4870         | 0.0031  | 0.9622  | 0.0378 | -0.0015     |
| Height                             | 5.5214         | 0.0002  | 0.9612  | 0.0388 | -0.0010     |
| Waist-to-hip ratio                 | 5.5884         | 0.0000  | 0.9604  | 0.0396 | -0.0009     |
| Education                          | 5.6460         | -0.0003 | 0.9614  | 0.0386 | 0.0010      |
| Hip circumference                  | 5.7232         | 0.0001  | 0.9607  | 0.0393 | -0.0007     |
| Waist circumference                | 5.7434         | 0.0001  | 0.9603  | 0.0397 | -0.0004     |
| Weight                             | 6.1228         | 0.0000  | 0.9594  | 0.0406 | -0.0009     |
| Duration of E+P use                | 6.1626         | 0.0006  | 0.9599  | 0.0401 | 0.0005      |
| <i>CRP</i> rs4546916               | 6.1910         | 0.0017  | 0.9587  | 0.0413 | -0.0012     |
| BMI                                | 6.1978         | 0.0000  | 0.9581  | 0.0419 | -0.0006     |
| Total months of breastfeeding      | 6.2060         | 0.0002  | 0.9574  | 0.0426 | -0.0007     |
| <i>CRP</i> rs7553007               | 6.2664         | 0.0023  | 0.9562  | 0.0438 | -0.0012     |
| <i>CRP</i> rs7551731               | 6.4542         | 0.0021  | 0.9574  | 0.0426 | 0.0013      |
| <i>CRP</i> rs1341665               | 6.8222         | 0.0016  | 0.9570  | 0.0430 | -0.0004     |
| <i>CRP</i> rs1205                  | 8.0524         | 0.0012  | 0.9564  | 0.0436 | -0.0007     |

BMI, body mass index; C-index, concordance index; E+P, exogenous estrogen + progestin; MET metabolic equivalent; VIMP, variable of importance. \*Variables are ordered by minimal depth. †Predictive value of variable was assessed via minimal depth in the nested random survival forest models. A lower value is likely to have a greater impact on prediction. ¶The incremental error rate of each variable was estimated in the nested sequence of models starting with the top variable, followed by the model with the top 2 variables, then the model with the top 3 variables, and so on. For example, the 3<sup>rd</sup> error rate was estimated from the 3<sup>rd</sup> nested model (including the 1<sup>st</sup>, 2<sup>nd</sup>, and 3<sup>rd</sup> variables). §The drop error rate was estimated by the difference between the error rates from the nested models with a prior and the corresponding variable. For example, the drop error rate of the 2<sup>nd</sup> variable was estimated by the difference between the error rates from the 1<sup>st</sup> and 2<sup>nd</sup> nested models. The error rate for the null model is set at 0.5; thus, the drop error rate for the 1<sup>st</sup> variable was obtained by subtracting the error rate (0.3406) from 0.5.

## Inflammatory genetic markers and CRC: post-GWAS RSF

**Table S3I.** The second stage of random survival forest analysis: predictive value of variables in low fat-diet group (< 9.0% calories from SFA)

| Variable*                          | Minimal Depth† | VIMP    | C-index | Error¶ | Drop Error§ |
|------------------------------------|----------------|---------|---------|--------|-------------|
| Duration of oral contraceptive use | 2.3760         | 0.0380  | 0.8533  | 0.1467 | 0.3533      |
| <i>HNF4A</i> rs1800961             | 3.4392         | 0.0255  | 0.9087  | 0.0913 | 0.0554      |
| <i>CRP</i> rs1800947               | 3.7850         | 0.0138  | 0.9173  | 0.0827 | 0.0085      |
| <i>ONECUT2</i> rs4092465           | 3.9060         | 0.0224  | 0.9458  | 0.0542 | 0.0285      |
| <i>METAP2</i> rs11108056           | 4.4608         | 0.0085  | 0.9440  | 0.0560 | -0.0019     |
| <i>NLRP3</i> rs10925027            | 4.5676         | 0.0059  | 0.9476  | 0.0524 | 0.0036      |
| <i>TOMM40</i> rs157581             | 4.8704         | 0.0147  | 0.9482  | 0.0518 | 0.0006      |
| <i>TOMM40</i> rs157582             | 4.9000         | 0.0127  | 0.9459  | 0.0541 | -0.0023     |
| Age at enrollment                  | 5.2120         | 0.0030  | 0.9475  | 0.0525 | 0.0017      |
| <i>TRAIP</i> rs2352975             | 5.2532         | 0.0036  | 0.9498  | 0.0502 | 0.0023      |
| <i>TOMM40</i> rs11556505           | 5.7586         | 0.0102  | 0.9513  | 0.0487 | 0.0015      |
| <i>GCKR</i> rs1260326              | 5.8828         | 0.0034  | 0.9528  | 0.0472 | 0.0015      |
| Total months of breastfeeding      | 5.9300         | 0.0004  | 0.9524  | 0.0476 | -0.0004     |
| <i>STARD10</i> rs7121935           | 6.0306         | 0.0045  | 0.9509  | 0.0491 | -0.0015     |
| Waist-to-hip ratio                 | 6.0872         | 0.0007  | 0.9508  | 0.0492 | -0.0001     |
| Duration of E+P use                | 6.4696         | 0.0008  | 0.9526  | 0.0474 | 0.0018      |
| Height                             | 6.6032         | -0.0001 | 0.9552  | 0.0448 | 0.0026      |
| <i>RGS6</i> rs2239222              | 6.6070         | 0.0028  | 0.9539  | 0.0461 | -0.0012     |
| <i>HNF1A</i> rs11065385            | 6.6214         | 0.0065  | 0.9530  | 0.0470 | -0.0009     |
| <i>HNF1A</i> rs11065384            | 6.7248         | 0.0059  | 0.9517  | 0.0483 | -0.0013     |
| <i>HNF1A</i> rs1183910             | 6.7818         | 0.0062  | 0.9514  | 0.0486 | -0.0003     |
| Age at menopause                   | 6.7838         | 0.0002  | 0.9513  | 0.0487 | -0.0001     |
| Hip circumference                  | 6.8202         | 0.0002  | 0.9503  | 0.0497 | -0.0010     |
| BMI                                | 6.8798         | 0.0003  | 0.9511  | 0.0489 | 0.0009      |
| <i>HNF1A</i> rs2244608             | 6.9668         | 0.0038  | 0.9490  | 0.0510 | -0.0021     |
| Waist circumference                | 7.0358         | -0.0001 | 0.9502  | 0.0498 | 0.0012      |
| <i>HNF1A-AS1</i> rs7953249         | 7.0712         | 0.0036  | 0.9507  | 0.0493 | 0.0005      |
| Weight                             | 7.1228         | 0.0002  | 0.9505  | 0.0495 | -0.0002     |
| Education                          | 7.2266         | -0.0003 | 0.9494  | 0.0506 | -0.0010     |
| <i>HNF1A-AS1</i> rs10774579        | 7.3834         | 0.0023  | 0.9479  | 0.0521 | -0.0015     |
| <i>HNF1A-AS1</i> rs1920792         | 7.4540         | 0.0023  | 0.9480  | 0.0520 | 0.0000      |

BMI, body mass index; C-index, concordance index; E+P, exogenous estrogen + progestin; SFA, saturated fatty acids; VIMP, variable of importance. \*Variables are ordered by minimal depth. †Predictive value of variable was assessed via minimal depth in the nested random survival forest models. A lower value is likely to have a greater impact on prediction. ¶The incremental error rate of each variable was estimated in the nested sequence of models starting with the top variable, followed by the model with the top 2 variables, then the model with the top 3 variables, and so on. For example, the 3<sup>rd</sup> error rate was estimated from the 3<sup>rd</sup> nested model (including the 1<sup>st</sup>, 2<sup>nd</sup>, and 3<sup>rd</sup> variables). §The drop error rate was estimated by the difference between the error rates from the nested models with a prior and the corresponding variable. For example, the drop error rate of the 2<sup>nd</sup> variable was estimated by the difference between the error rates from the 1<sup>st</sup> and 2<sup>nd</sup> nested models. The error rate for the null model is set at 0.5; thus, the drop error rate for the 1<sup>st</sup> variable was obtained by subtracting the error rate (0.3533) from 0.5.

## Inflammatory genetic markers and CRC: post-GWAS RSF

**Table S3J.** The second stage of random survival forest analysis: predictive value of variables in high fat-diet group ( $\geq 9.0\%$  calories from SFA)

| Variable*                          | Minimal Depth† | VIMP    | C-index | Error¶ | Drop Error§ |
|------------------------------------|----------------|---------|---------|--------|-------------|
| Duration of oral contraceptive use | 1.9438         | 0.0480  | 0.8444  | 0.1556 | 0.3444      |
| <i>HNF4A</i> rs1800961             | 2.4968         | 0.0297  | 0.9318  | 0.0682 | 0.0874      |
| <i>ONECUT2</i> rs4092465           | 2.8286         | 0.0169  | 0.9561  | 0.0439 | 0.0243      |
| <i>CRP</i> rs1800947               | 3.0134         | 0.0153  | 0.9552  | 0.0448 | -0.0009     |
| <i>METAP2</i> rs11108056           | 3.2954         | 0.0102  | 0.9561  | 0.0439 | 0.0009      |
| <i>NLRP3</i> rs10925027            | 3.4476         | 0.0082  | 0.9572  | 0.0428 | 0.0011      |
| <i>TOMM40</i> rs157581             | 4.0982         | 0.0127  | 0.9559  | 0.0441 | -0.0013     |
| <i>TOMM40</i> rs157582             | 4.1014         | 0.0115  | 0.9570  | 0.0430 | 0.0011      |
| <i>TOMM40</i> rs11556505           | 4.3028         | 0.0148  | 0.9579  | 0.0421 | 0.0009      |
| <i>TRAIP</i> rs2352975             | 4.3790         | 0.0028  | 0.9604  | 0.0396 | 0.0025      |
| <i>DUSP1</i> rs17658229            | 4.4004         | 0.0053  | 0.9659  | 0.0341 | 0.0055      |
| Age at enrollment                  | 4.7984         | 0.0011  | 0.9656  | 0.0344 | -0.0003     |
| Waist-to-hip ratio                 | 5.3352         | 0.0000  | 0.9653  | 0.0347 | -0.0004     |
| <i>HNF1A</i> rs11065385            | 5.3556         | 0.0055  | 0.9650  | 0.0350 | -0.0003     |
| Hip circumference                  | 5.3852         | 0.0000  | 0.9640  | 0.0360 | -0.0010     |
| Age at menopause                   | 5.3868         | 0.0001  | 0.9634  | 0.0366 | -0.0006     |
| Duration of E+P use                | 5.5778         | 0.0006  | 0.9649  | 0.0351 | 0.0015      |
| <i>CRP</i> rs7553007               | 5.5802         | 0.0014  | 0.9647  | 0.0353 | -0.0002     |
| Education                          | 5.6508         | -0.0003 | 0.9643  | 0.0357 | -0.0004     |
| Height                             | 5.6578         | -0.0001 | 0.9631  | 0.0369 | -0.0012     |
| Waist circumference                | 5.7086         | -0.0001 | 0.9624  | 0.0376 | -0.0006     |
| BMI                                | 5.9430         | -0.0003 | 0.9616  | 0.0384 | -0.0008     |
| <i>HNF1A-AS1</i> rs7953249         | 5.9834         | 0.0045  | 0.9615  | 0.0385 | -0.0001     |
| <i>HNF1A</i> rs2243458             | 6.0142         | 0.0027  | 0.9604  | 0.0396 | -0.0011     |
| Weight                             | 6.0170         | -0.0001 | 0.9597  | 0.0403 | -0.0008     |
| Total months of breastfeeding      | 6.5938         | 0.0001  | 0.9615  | 0.0385 | 0.0019      |
| <i>HNF1A-AS1</i> rs10774579        | 6.9126         | 0.0043  | 0.9608  | 0.0392 | -0.0007     |
| <i>HNF1A-AS1</i> rs1920792         | 6.9468         | 0.0044  | 0.9603  | 0.0397 | -0.0005     |

BMI, body mass index; C-index, concordance index; E+P, exogenous estrogen + progestin; SFA, saturated fatty acids; VIMP, variable of importance. \*Variables are ordered by minimal depth. †Predictive value of variable was assessed via minimal depth in the nested random survival forest models. A lower value is likely to have a greater impact on prediction. ¶The incremental error rate of each variable was estimated in the nested sequence of models starting with the top variable, followed by the model with the top 2 variables, then the model with the top 3 variables, and so on. For example, the 3<sup>rd</sup> error rate was estimated from the 3<sup>rd</sup> nested model (including the 1<sup>st</sup>, 2<sup>nd</sup>, and 3<sup>rd</sup> variables). §The drop error rate was estimated by the difference between the error rates from the nested models with a prior and the corresponding variable. For example, the drop error rate of the 2<sup>nd</sup> variable was estimated by the difference between the error rates from the 1<sup>st</sup> and 2<sup>nd</sup> nested models. The error rate for the null model is set at 0.5; thus, the drop error rate for the 1<sup>st</sup> variable was obtained by subtracting the error rate (0.3444) from 0.5.

## Inflammatory genetic markers and CRC: post-GWAS RSF

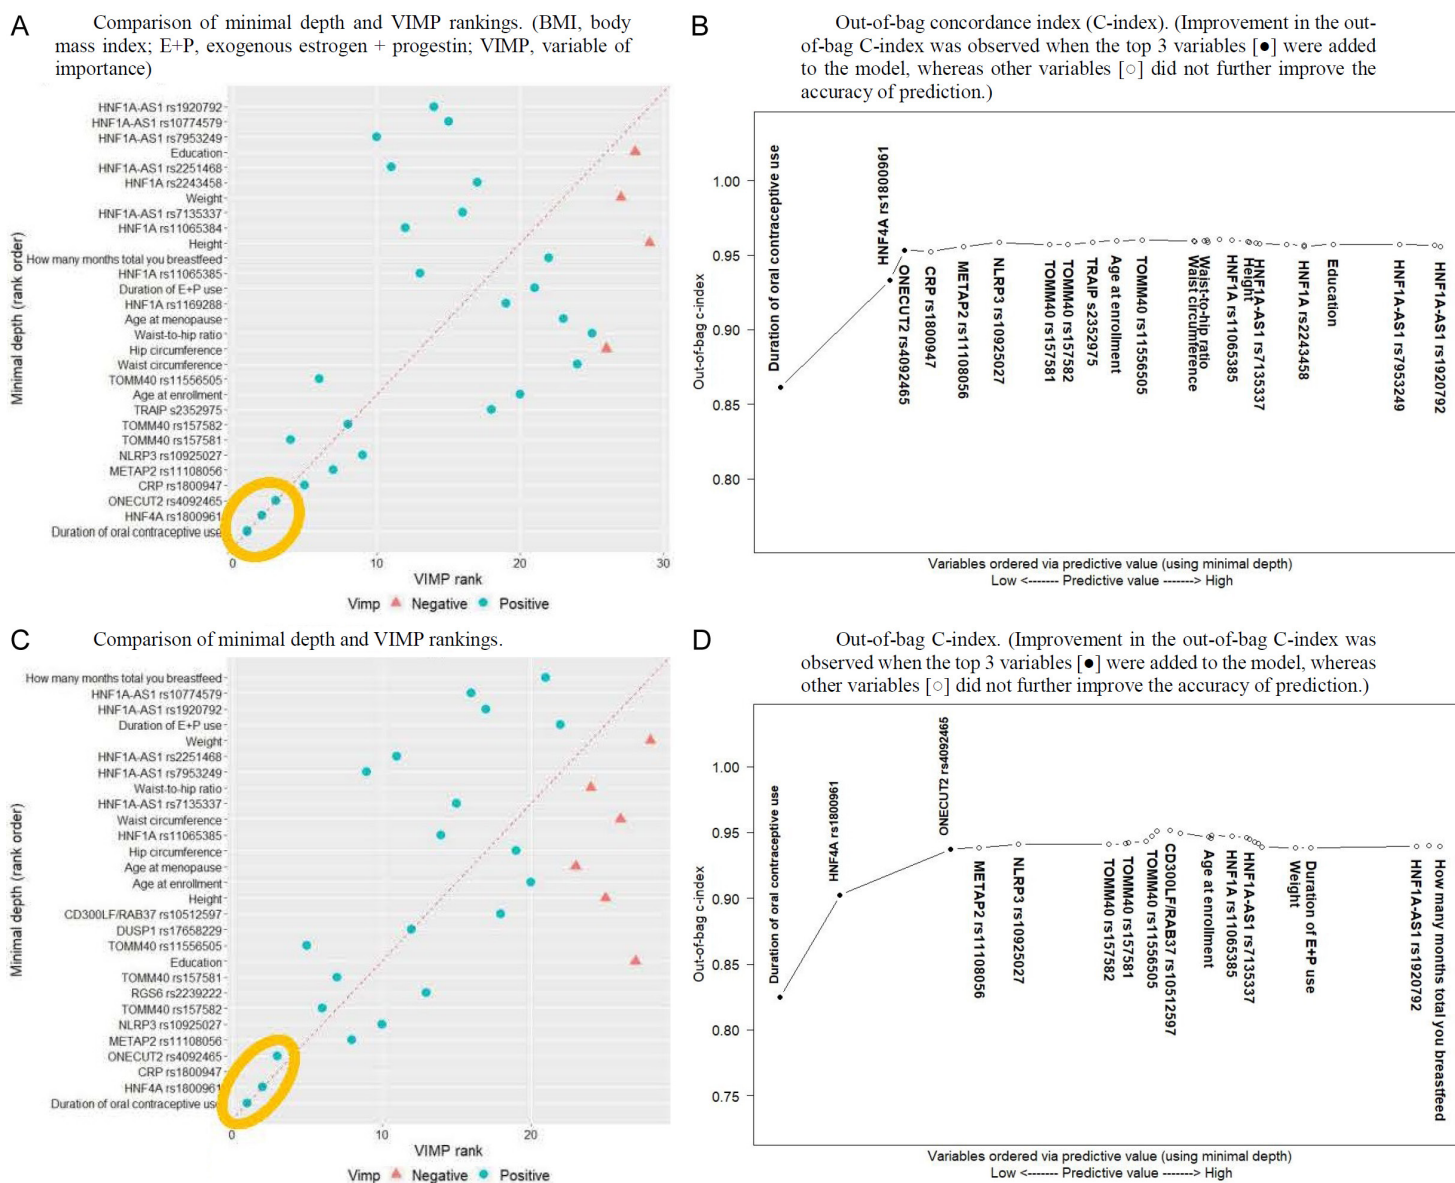

**Figure S4.** BMI-stratified analysis: the second stage of random survival forest (RSF) with 18 single-nucleotide polymorphisms (SNPs) and 12 behavioral factors selected from the first stage of RSF in non-overall obese group (BMI < 30, A and B); and with 17 SNPs and 12 behavioral factors selected in overall obese group (BMI ≥ 30, C and D). The variables within the gold ellipses in (A and C) were identified as the most influential predictors.

## Inflammatory genetic markers and CRC: post-GWAS RSF

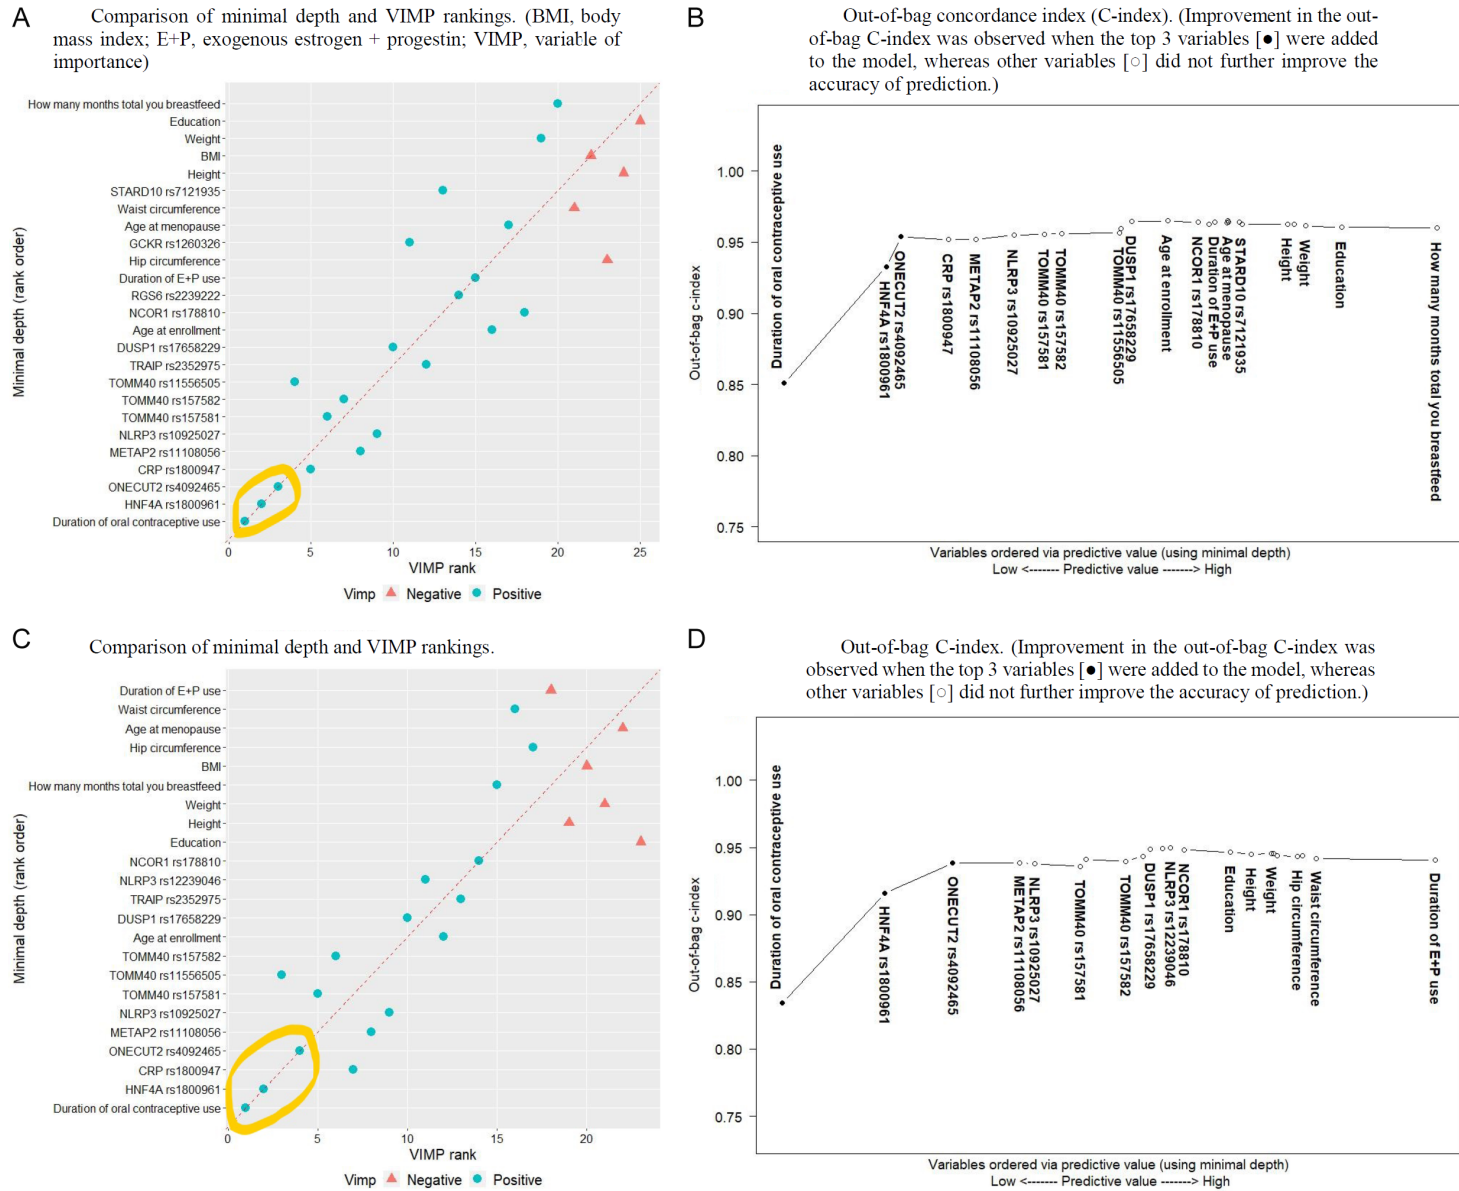

**Figure S5.** WHR-stratified analysis: the second stage of random survival forest (RSF) with 14 single-nucleotide polymorphisms (SNPs) and 12 behavioral factors selected from the first stage of RSF in non-viscerally obese group (WHR  $\leq 0.85$ , A and B); and with 12 SNPs and 12 behavioral factors selected in viscerally obese group (WHR  $> 0.85$ , C and D). The variables within the gold ellipses in (A and C) were identified as the most influential predictors. (WHR, waist-to-hip ratio).



# Inflammatory genetic markers and CRC: post-GWAS RSF

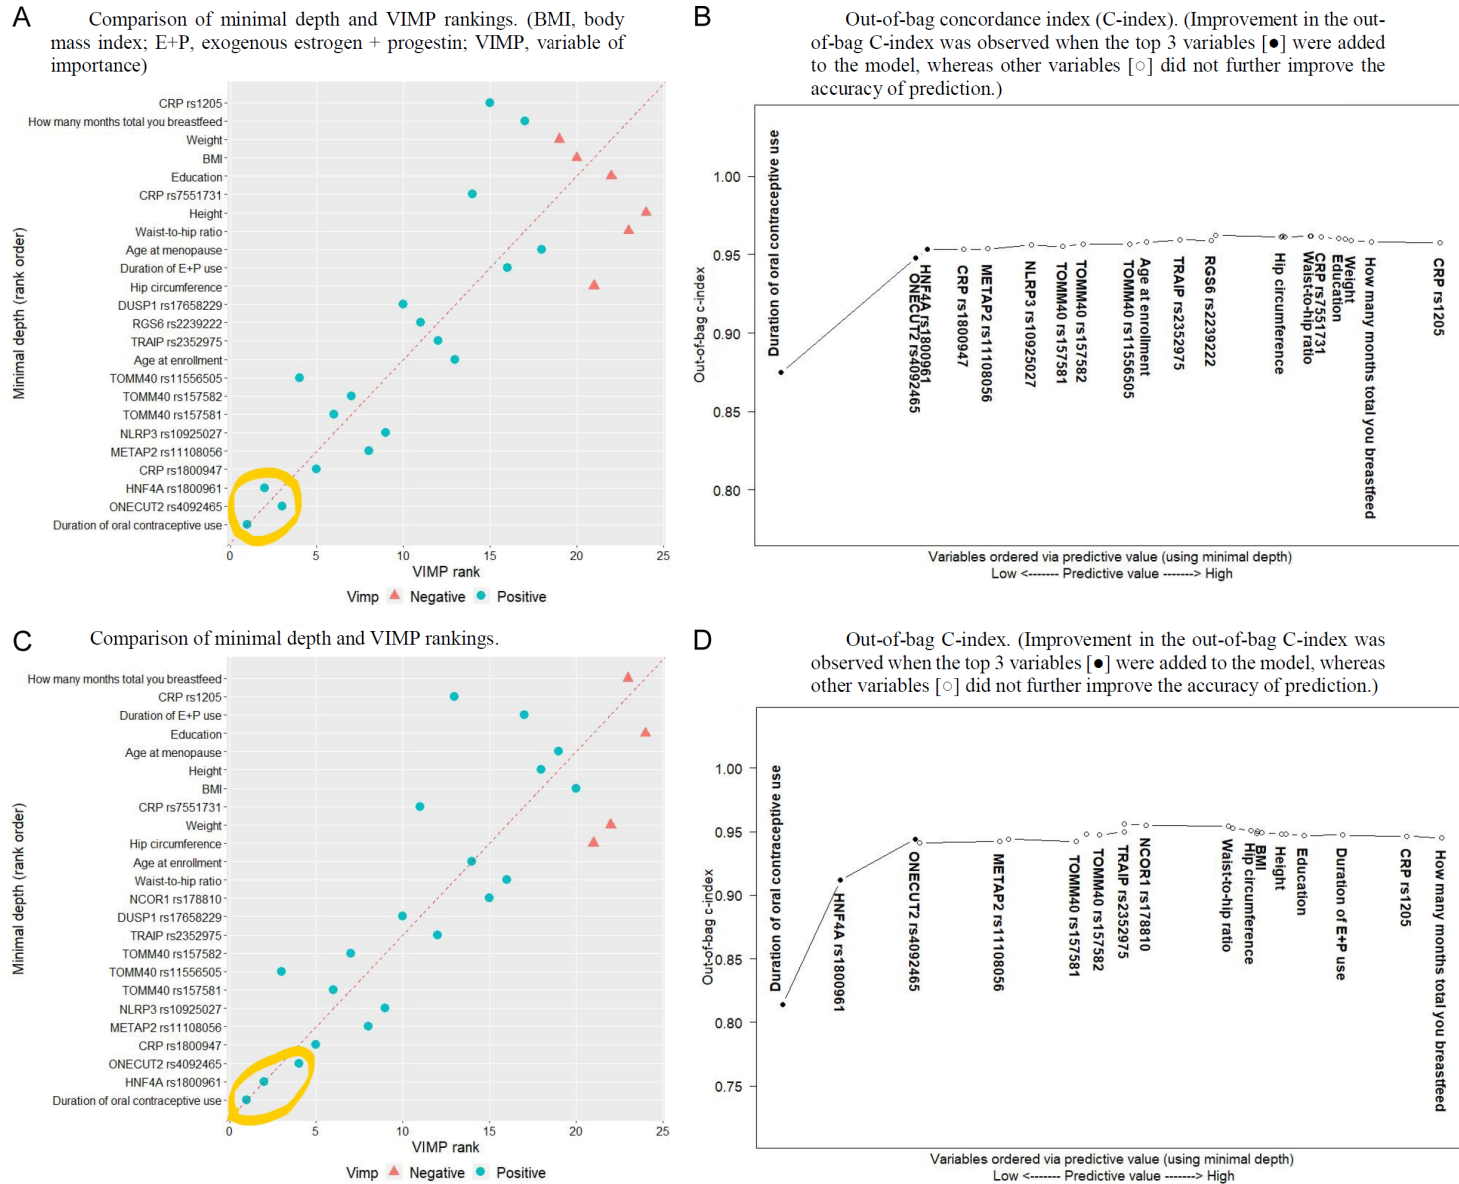

**Figure S6.** WST-stratified analysis: the second stage of random survival forest (RSF) with 13 single-nucleotide polymorphisms (SNPs) and 12 behavioral factors selected from the first stage of RSF in non-viscerally obese group (WST  $\leq 88$ , A and B); and with 13 SNPs and 12 behavioral factors in viscerally obese group (WST  $> 88$ , C and D). The variables within the gold ellipses in (A and C) were identified as the most influential predictors. (WST, waist circumference.).

# Inflammatory genetic markers and CRC: post-GWAS RSF

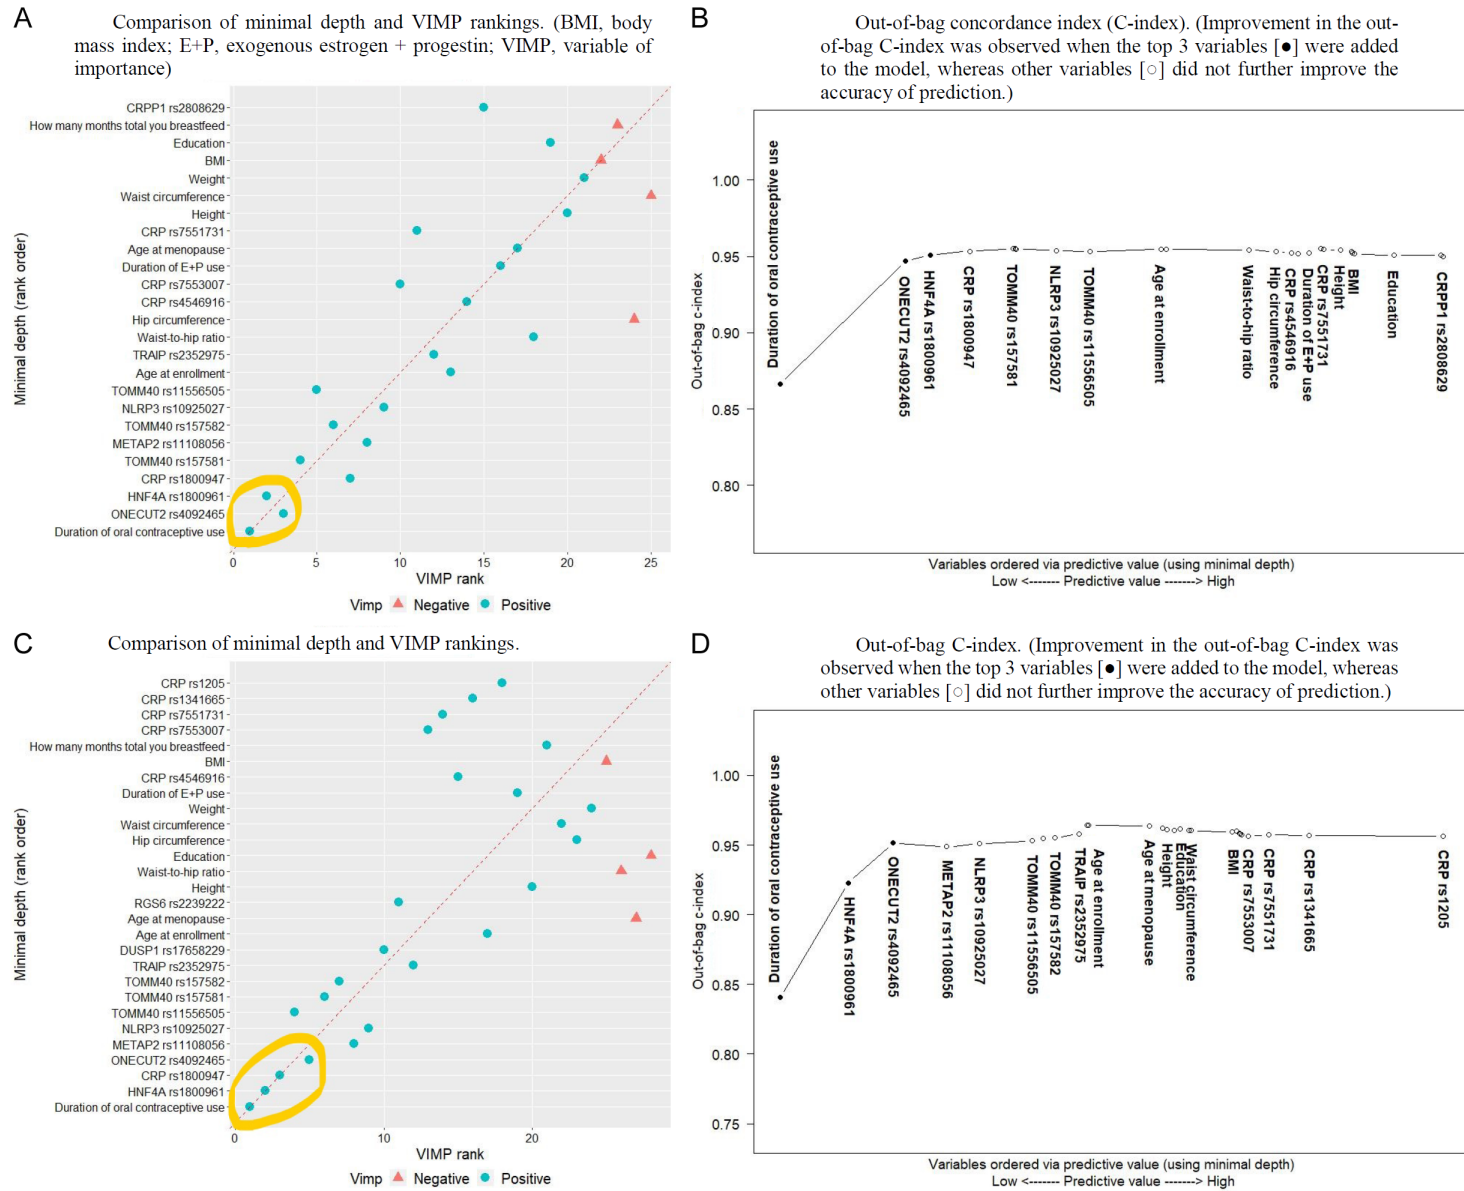

**Figure S7.** Physical activity-stratified analysis: the second stage of random survival forest (RSF) with 13 single-nucleotide polymorphisms (SNPs) and 12 behavioral factors selected from the first stage of RSF in active group (metabolic equivalent [MET]  $\geq 10$ , A and B); and with 16 SNPs and 12 behavioral factors in inactive group (MET  $< 10$ , C and D). The variables within the gold ellipses in (A and C) were identified as the most influential predictors.



## Inflammatory genetic markers and CRC: post-GWAS RSF

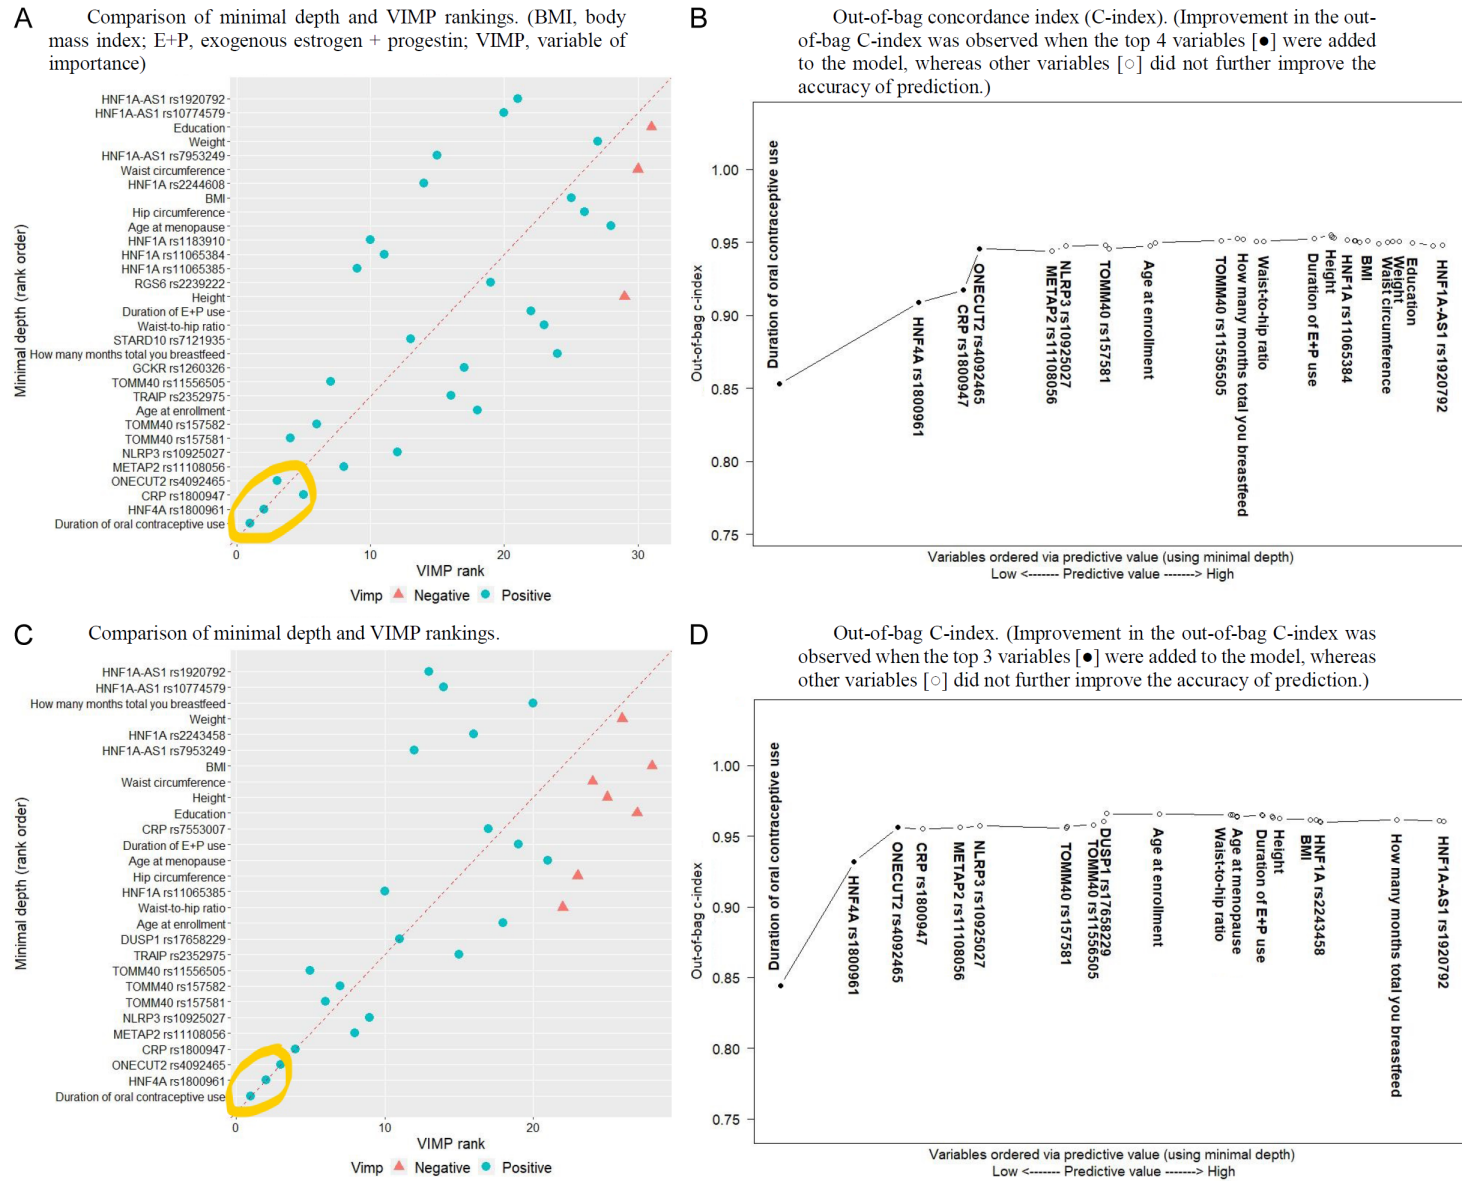

**Figure S8.** SFA-stratified analysis: the second stage of random survival forest (RSF) with 19 single-nucleotide polymorphisms (SNPs) and 12 behavioral factors selected from the first stage of RSF in low fat-diet group (< 9.0% calories from SFA, A and B); and with 16 SNPs and 12 behavioral factors in high fat-diet group (≥ 9.0% calories from SFA, C and D). The variables within the gold ellipses in (A and C) were identified as the most influential predictors. (SFA, saturated fatty acids.)

## Inflammatory genetic markers and CRC: post-GWAS RSF

**Table S4A.** Overall analysis: results from multivariate regression predicting CRC risk

| Variable                              | HR† (95% CI)            | p                 |
|---------------------------------------|-------------------------|-------------------|
| SNP (Ref/Alt)                         |                         |                   |
| <i>ONECUT2</i> rs4092465 (GG + AA/GA) | <b>7.49 (5.95-9.42)</b> | <b>&lt; 2e-16</b> |
| <i>HNF4A</i> rs1800961 (CC + CT/TT)   | <b>2.68 (1.61-4.48)</b> | <b>0.000158</b>   |
| Behavioral factor*                    |                         |                   |
| Duration of oral contraceptive use    | <b>2.88 (2.48-3.35)</b> | <b>&lt; 2e-16</b> |

Alt, alternative allele; CI, confidence interval; CRC, colorectal cancer; HR, hazard ratio; Ref, reference allele; SNP, single-nucleotide polymorphism. Numbers in bold face are statistically significant. †Multivariate regression was adjusted by age at enrollment, education, body mass index, waist-to-hip ratio, age at menopause, total months of breastfeeding, and exogenous estrogen plus progestin. \*A behavioral factor was analyzed as a binary variable via a cutoff value, where the cutoff level and/or higher reflects a greater risk for CRC on the basis of random survival forest analysis. The cutoff for oral contraceptive use was 5.1 years.

**Table S4B.** Stratified analysis: results from multivariate regression predicting CRC risk

| Variable                                                          | HR† (95% CI)             | p                 |
|-------------------------------------------------------------------|--------------------------|-------------------|
| <Non-overall obese group (BMI < 30 kg/m <sup>2</sup> ) (n=7,151)> |                          |                   |
| SNPs (Ref/Alt)                                                    |                          |                   |
| <i>ONECUT2</i> rs4092465 (GG + AA/GA)                             | <b>7.25 (5.56-9.47)</b>  | <b>&lt; 2e-16</b> |
| <i>HNF4A</i> rs1800961 (CC + CT/TT)                               | <b>2.63 (1.45-4.78)</b>  | <b>0.00153</b>    |
| Behavioral factor*                                                |                          |                   |
| Duration of oral contraceptive use                                | <b>3.01 (2.52-3.58)</b>  | <b>&lt; 2e-16</b> |
| <Overall obese group (BMI ≥ 30 kg/m <sup>2</sup> ) (n=2,991)>     |                          |                   |
| SNPs (Ref/Alt)                                                    |                          |                   |
| <i>ONECUT2</i> rs4092465 (GG + AA/GA)                             | <b>8.27 (5.26-13.01)</b> | <b>&lt; 2e-16</b> |
| <i>HNF4A</i> rs1800961 (CC + CT/TT)                               | <b>2.90 (1.08-7.85)</b>  | <b>0.03549</b>    |
| Behavioral factor*                                                |                          |                   |
| Duration of oral contraceptive use                                | <b>2.76 (2.06-3.70)</b>  | <b>8.91E-12</b>   |
| <Non-viscerally obese group, WHR ≤ 0.85 (n=7,222)>                |                          |                   |
| SNPs (Ref/Alt)                                                    |                          |                   |
| <i>ONECUT2</i> rs4092465 (GG + AA/GA)                             | <b>8.27 (6.21-11.02)</b> | <b>&lt; 2e-16</b> |
| <i>HNF4A</i> rs1800961 (CC + CT/TT)                               | <b>4.38 (1.96-9.81)</b>  | <b>0.000321</b>   |
| Behavioral factor*                                                |                          |                   |
| Duration of oral contraceptive use                                | <b>3.08 (2.57-3.68)</b>  | <b>&lt; 2e-16</b> |
| <Viscerally obese group, WHR > 0.85 (n=2,920)>                    |                          |                   |
| SNPs (Ref/Alt)                                                    |                          |                   |
| <i>ONECUT2</i> rs4092465 (GG + AA/GA)                             | <b>6.04 (4.11-8.88)</b>  | <b>&lt; 2e-16</b> |
| Behavioral factor*                                                |                          |                   |
| Duration of oral contraceptive use                                | <b>2.44 (1.85-3.21)</b>  | <b>1.88E-10</b>   |
| <Non-viscerally obese group, WST ≤ 88 cm (n=5,998)>               |                          |                   |
| SNPs (Ref/Alt)                                                    |                          |                   |
| <i>ONECUT2</i> rs4092465 (GG + AA/GA)                             | <b>7.53 (5.55-10.23)</b> | <b>&lt; 2e-16</b> |
| <i>HNF4A</i> rs1800961 (CC + CT/TT)                               | <b>4.50 (1.86-10.88)</b> | <b>0.000835</b>   |
| Behavioral factor*                                                |                          |                   |
| Duration of oral contraceptive use                                | <b>3.46 (2.84-4.21)</b>  | <b>&lt; 2e-16</b> |
| <Viscerally obese group, WST > 88 cm (n=4,144)>                   |                          |                   |
| SNPs (Ref/Alt)                                                    |                          |                   |
| <i>ONECUT2</i> rs4092465 (GG + AA/GA)                             | <b>7.42 (5.24-10.50)</b> | <b>&lt; 2e-16</b> |
| <i>HNF4A</i> rs1800961 (CC + CT/TT)                               | <b>1.79 (0.95-3.37)</b>  | <b>0.06981</b>    |

## Inflammatory genetic markers and CRC: post-GWAS RSF

|                                                            |                          |                   |
|------------------------------------------------------------|--------------------------|-------------------|
| Behavioral factor*                                         |                          |                   |
| Duration of oral contraceptive use                         | <b>2.38 (1.89-3.00)</b>  | <b>1.28E-13</b>   |
| <Active group, MET $\geq$ 10.0 (n=4,203)>                  |                          |                   |
| SNPs (Ref/Alt)                                             |                          |                   |
| <i>ONECUT2</i> rs4092465 (GG + AA/GA)                      | <b>7.42 (5.23-10.55)</b> | <b>&lt; 2e-16</b> |
| <i>HNF4A</i> rs1800961 (CC + CT/TT)                        | <b>3.28 (1.35-7.95)</b>  | <b>0.00850</b>    |
| Behavioral factor*                                         |                          |                   |
| Duration of oral contraceptive use                         | <b>2.57 (2.04-3.22)</b>  | <b>3.96E-16</b>   |
| <Inactive group, MET < 10.0 (n=5,939)>                     |                          |                   |
| SNPs (Ref/Alt)                                             |                          |                   |
| <i>ONECUT2</i> rs4092465 (GG + AA/GA)                      | <b>7.49 (5.53-10.16)</b> | <b>&lt; 2e-16</b> |
| <i>HNF4A</i> rs1800961 (CC + CT/TT)                        | <b>2.34 (1.25-4.39)</b>  | <b>0.00792</b>    |
| Behavioral factor*                                         |                          |                   |
| Duration of oral contraceptive use                         | <b>3.15 (2.58-3.86)</b>  | <b>&lt; 2e-16</b> |
| <Low fat-diet group, < 9.0% cal. from SFA (n=2,290)>       |                          |                   |
| SNPs (Ref/Alt)                                             |                          |                   |
| <i>ONECUT2</i> rs4092465 (GG + AA/GA)                      | <b>9.91 (5.92-16.62)</b> | <b>&lt; 2e-16</b> |
| <i>HNF4A</i> rs1800961 (CC + CT/TT)                        | <b>5.99 (1.48-24.26)</b> | <b>0.012135</b>   |
| Behavioral factor*                                         |                          |                   |
| Duration of oral contraceptive use                         | <b>3.60 (2.63-4.93)</b>  | <b>1.21E-15</b>   |
| <High fat-diet group, $\geq$ 9.0% cal. from SFA (n=7,852)> |                          |                   |
| SNPs (Ref/Alt)                                             |                          |                   |
| <i>ONECUT2</i> rs4092465 (GG + AA/GA)                      | <b>7.01 (5.42-9.06)</b>  | <b>&lt; 2e-16</b> |
| <i>HNF4A</i> rs1800961 (CC + CT/TT)                        | <b>2.26 (1.30-3.92)</b>  | <b>0.00368</b>    |
| Behavioral factor*                                         |                          |                   |
| Duration of oral contraceptive use                         | <b>2.70 (2.27-3.20)</b>  | <b>&lt; 2e-16</b> |

Alt, alternative allele; BMI, body mass index; CI, confidence interval; CRC, colorectal cancer; HR, hazard ratio; MET, metabolic equivalent; Ref, reference allele; SFA, saturated fatty acids; SNP, single-nucleotide polymorphism; WHR, waist-to-hip ratio; WST, waist circumference. Numbers in bold face are statistically significant. †Multivariate regression was adjusted by age at enrollment, education, BMI, WHR, age at menopause, total months of breastfeeding, and exogenous estrogen plus progestin; variables used to stratify were not included as covariates in the multivariate analysis; additional variables were adjusted in specific strata (height and weight were adjusted in BMI strata; waist and hip circumferences, in WHR strata; and hip circumference instead of WHR, in WST strata). \*A behavioral factor was analyzed as a binary variable via a cutoff value, where the cutoff level and/or higher reflects a greater risk for CRC on the basis of random survival forest analysis. The cutoff for oral contraceptive use was 5.1 years.

## Inflammatory genetic markers and CRC: post-GWAS RSF

**Table S5.** Combined effect of past OC use and risk genotypes (ONECUT2 rs4092465 GA; HNF4A rs1800961 TT) on CRC risk in obesity strata

| n£                                                    | n total | HR† (95% CI)               | p*       |
|-------------------------------------------------------|---------|----------------------------|----------|
| <Non-viscerally obese group, WHR ≤ 0.85 (n=7,222)>    |         |                            |          |
| 0                                                     | 2,590   | reference                  |          |
| 1                                                     | 3,525   | <b>5.45 (3.78-7.85)</b>    | < 2e-16  |
| 2                                                     | 1,107   | <b>22.63 (15.68-32.66)</b> | < 2e-16  |
| $p_{\text{trend}}$                                    |         |                            | < 2e-16  |
| <Viscerally obese group, WHR > 0.85 (n=2,920)>§       |         |                            |          |
| 0                                                     | 908     | reference                  |          |
| 1                                                     | 1,456   | <b>3.01 (1.88-4.83)</b>    | 4.98E-06 |
| 2                                                     | 556     | <b>11.00 (6.84-17.69)</b>  | < 2e-16  |
| $p_{\text{trend}}$                                    |         |                            | < 2e-16  |
| <Non-viscerally obese group, WST ≤ 88 cm (n=5,998)>   |         |                            |          |
| 0                                                     | 2,206   | reference                  |          |
| 1                                                     | 2,953   | <b>4.95 (3.39-7.24)</b>    | < 2e-16  |
| 2                                                     | 839     | <b>22.06 (15.04-32.35)</b> | < 2e-16  |
| $p_{\text{trend}}$                                    |         |                            | < 2e-16  |
| <Viscerally obese group, WST > 88 cm (n=4,144)>       |         |                            |          |
| 0                                                     | 1,353   | reference                  |          |
| 1                                                     | 1,996   | <b>3.78 (2.49-5.76)</b>    | 5.35E-10 |
| 2                                                     | 795     | <b>13.64 (8.96-20.76)</b>  | < 2e-16  |
| $p_{\text{trend}}$                                    |         |                            | < 2e-16  |
| <Active group, MET ≥ 10.0 (n=4,203)>                  |         |                            |          |
| 0                                                     | 1,481   | reference                  |          |
| 1                                                     | 2,105   | <b>4.71 (3.09-7.19)</b>    | 6.12E-13 |
| 2                                                     | 617     | <b>16.80 (10.92-25.85)</b> | < 2e-16  |
| $p_{\text{trend}}$                                    |         |                            | < 2e-16  |
| <Inactive group, MET < 10.0 (n=5,939)>                |         |                            |          |
| 0                                                     | 2,078   | reference                  |          |
| 1                                                     | 2,844   | <b>4.16 (2.85-6.07)</b>    | 1.42E-13 |
| 2                                                     | 1,017   | <b>18.03 (12.38-26.27)</b> | < 2e-16  |
| $p_{\text{trend}}$                                    |         |                            | < 2e-16  |
| <Low fat-diet group, < 9.0% cal. from SFA (n=2,290)>  |         |                            |          |
| 0                                                     | 788     | reference                  |          |
| 1                                                     | 1,137   | <b>3.36 (1.88-5.99)</b>    | 4.05E-05 |
| 2                                                     | 365     | <b>19.93 (11.28-35.21)</b> | < 2e-16  |
| $p_{\text{trend}}$                                    |         |                            | < 2e-16  |
| <High fat-diet group, ≥ 9.0% cal. from SFA (n=7,852)> |         |                            |          |
| 0                                                     | 2,771   | reference                  |          |
| 1                                                     | 3,812   | <b>4.75 (3.44-6.56)</b>    | < 2e-16  |
| 2                                                     | 1,269   | <b>16.94 (12.22-23.49)</b> | < 2e-16  |
| $p_{\text{trend}}$                                    |         |                            | < 2e-16  |

CI, confidence interval; CRC, colorectal cancer; HR, hazard ratio; MET, metabolic equivalent; OC, oral contraceptive; SFA, saturated fatty acids; WHR, waist-to-hip ratio; WST, waist circumference. Numbers in bold face are statistically significant. £The combined number of risk genotypes and behavioral factors was based on 1) risk genotypes defined as 0 (low risk: none or 1 risk allele) and 1 (high risk: 2 risk alleles) and 2) behavioral factors defined as 0 (low risk: past OC use ≥ 5.1 years) and 1 (high risk: past OC use < 5.1 years). The ultimate number of combined risk genotypes and behavioral factors was defined as 0 (low risk for genotypes and behaviors), 1 (high risk for either genotypes or behaviors), and 2 (high risk for both genotypes and behaviors). §In the viscerally obese group (WHR), only the *ONECUT2* rs4092465 GA genotype was analyzed. †Multivariate regression was adjusted by age at enrollment, education, body mass index, hip and waist circumferences (both in WHR strata; hip only in WST strata), waist-to-hip ratio (in MET and SFA strata), age at menopause, total months of breastfeeding, and exogenous estrogen plus progestin. \*p values were adjusted to correct for multiple testing via the Benjamini-Hochberg approach.

## Inflammatory genetic markers and CRC: post-GWAS RSF

**Table S6.** Joint effect of past OC use with risk genotypes (ONECUT2 rs4092465 GA; HNF4A rs1800961 TT) on CRC risk in obesity strata

| n£                                                    | Total                     |                   | Past OC use ≥ 5.1 years |                         |                   | Past OC use < 5.1 years |                            |                   |
|-------------------------------------------------------|---------------------------|-------------------|-------------------------|-------------------------|-------------------|-------------------------|----------------------------|-------------------|
|                                                       | HR† (95% CI)              | p*                | n                       | HR† (95% CI)            | p*                | n                       | HR† (95% CI)               | p*                |
| <Non-viscerally obese group, WHR ≤ 0.85 (n=7,222)>    |                           |                   |                         |                         |                   |                         |                            |                   |
| Risk genotypes                                        |                           |                   |                         |                         |                   |                         |                            |                   |
| 0                                                     | reference                 |                   | 2,590                   | reference               |                   | 984                     | <b>1.80 (1.04-3.11)</b>    | <b>0.036327</b>   |
| 1                                                     | <b>8.76 (6.61-11.61)</b>  | <b>&lt; 2e-16</b> | 2,541                   | <b>6.72 (4.66-9.70)</b> | <b>&lt; 2e-16</b> | 1,107                   | <b>22.05 (15.28-31.83)</b> | <b>&lt; 2e-16</b> |
|                                                       | <i>p</i> <sub>trend</sub> |                   |                         |                         | <b>&lt; 2e-16</b> |                         |                            |                   |
| <Viscerally obese group, WHR > 0.85 (n=2,920)>        |                           |                   |                         |                         |                   |                         |                            |                   |
| Risk genotypes§                                       |                           |                   |                         |                         |                   |                         |                            |                   |
| 0                                                     | reference                 |                   | 908                     | reference               |                   | 479                     | 0.96 (0.44-2.11)           | 0.928426          |
| 1                                                     | <b>6.02 (4.09 - 8.85)</b> | <b>&lt; 2e-16</b> | 977                     | <b>3.85 (2.39-6.20)</b> | <b>3.19e-08</b>   | 556                     | <b>10.82 (6.73-17.40)</b>  | <b>&lt; 2e-16</b> |
|                                                       | <i>p</i> <sub>trend</sub> |                   |                         |                         | <b>&lt; 2e-16</b> |                         |                            |                   |
| <Non-viscerally obese group, WST ≤ 88 cm (n=5,998)>   |                           |                   |                         |                         |                   |                         |                            |                   |
| Risk genotypes                                        |                           |                   |                         |                         |                   |                         |                            |                   |
| 0                                                     | reference                 |                   | 2,206                   | reference               |                   | 747                     | <b>2.02 (1.14-3.58)</b>    | <b>0.01653</b>    |
| 1                                                     | <b>7.60 (5.65-10.21)</b>  | <b>&lt; 2e-16</b> | 2,206                   | <b>5.82 (3.98-8.53)</b> | <b>&lt; 2e-16</b> | 839                     | <b>21.66 (14.76-31.77)</b> | <b>&lt; 2e-16</b> |
|                                                       | <i>p</i> <sub>trend</sub> |                   |                         |                         | <b>&lt; 2e-16</b> |                         |                            |                   |
| <Viscerally obese group, WST > 88 cm (n=4,144)>       |                           |                   |                         |                         |                   |                         |                            |                   |
| Risk genotypes                                        |                           |                   |                         |                         |                   |                         |                            |                   |
| 0                                                     | reference                 |                   | 1,353                   | reference               |                   | 745                     | 1.23 (0.65-2.32)           | 0.52740           |
| 1                                                     | <b>7.15 (5.15-9.93)</b>   | <b>&lt; 2e-16</b> | 1,251                   | <b>5.06 (3.31-7.74)</b> | <b>6.47e-14</b>   | 795                     | <b>13.35 (8.77-20.32)</b>  | <b>&lt; 2e-16</b> |
|                                                       | <i>p</i> <sub>trend</sub> |                   |                         |                         | <b>&lt; 2e-16</b> |                         |                            |                   |
| <Active group, MET ≥ 10.0 (n=4,203)>                  |                           |                   |                         |                         |                   |                         |                            |                   |
| Risk genotypes                                        |                           |                   |                         |                         |                   |                         |                            |                   |
| 0                                                     | reference                 |                   | 1,481                   | reference               |                   | 563                     | 1.25 (0.62-2.55)           | 0.53390           |
| 1                                                     | <b>7.97 (5.64-11.28)</b>  | <b>&lt; 2e-16</b> | 1,542                   | <b>5.85 (3.83-8.93)</b> | <b>3.13e-16</b>   | 617                     | <b>16.39 (10.65-25.22)</b> | <b>&lt; 2e-16</b> |
|                                                       | <i>p</i> <sub>trend</sub> |                   |                         |                         | <b>&lt; 2e-16</b> |                         |                            |                   |
| <Inactive group, MET < 10.0 (n=5,939)>                |                           |                   |                         |                         |                   |                         |                            |                   |
| Risk genotypes                                        |                           |                   |                         |                         |                   |                         |                            |                   |
| 0                                                     | reference                 |                   | 2,078                   | reference               |                   | 929                     | <b>1.83 (1.07-3.13)</b>    | <b>0.02792</b>    |
| 1                                                     | <b>6.97 (5.25-9.26)</b>   | <b>&lt; 2e-16</b> | 1,915                   | <b>5.13 (3.50-7.52)</b> | <b>&lt; 2e-16</b> | 1,017                   | <b>17.67 (12.13-25.74)</b> | <b>&lt; 2e-16</b> |
|                                                       | <i>p</i> <sub>trend</sub> |                   |                         |                         | <b>&lt; 2e-16</b> |                         |                            |                   |
| <Low fat-diet group, < 9.0% cal. from SFA (n=2,290)>  |                           |                   |                         |                         |                   |                         |                            |                   |
| Risk genotypes                                        |                           |                   |                         |                         |                   |                         |                            |                   |
| 0                                                     | reference                 |                   | 788                     | reference               |                   | 362                     | 0.67 (0.22-2.06)           | 0.488644          |
| 1                                                     | <b>9.73 (5.96-15.90)</b>  | <b>&lt; 2e-16</b> | 775                     | <b>4.50 (2.52-8.05)</b> | <b>3.99e-07</b>   | 365                     | <b>19.59 (11.09-34.60)</b> | <b>&lt; 2e-16</b> |
|                                                       | <i>p</i> <sub>trend</sub> |                   |                         |                         | <b>&lt; 2e-16</b> |                         |                            |                   |
| <High fat-diet group, ≥ 9.0% cal. from SFA (n=7,852)> |                           |                   |                         |                         |                   |                         |                            |                   |
| Risk genotypes                                        |                           |                   |                         |                         |                   |                         |                            |                   |
| 0                                                     | reference                 |                   | 2,771                   | reference               |                   | 1,130                   | <b>1.90 (1.19-3.04)</b>    | <b>0.00715</b>    |
| 1                                                     | <b>6.92 (5.42-8.85)</b>   | <b>&lt; 2e-16</b> | 2,682                   | <b>5.80 (4.19-8.03)</b> | <b>&lt; 2e-16</b> | 1,269                   | <b>16.50 (11.90-22.89)</b> | <b>&lt; 2e-16</b> |
|                                                       | <i>p</i> <sub>trend</sub> |                   |                         |                         | <b>&lt; 2e-16</b> |                         |                            |                   |

CI, confidence interval; CRC, colorectal cancer; HR, hazard ratio; MET, metabolic equivalent; OC, oral contraceptive; SFA, saturated fatty acids; WHR, waist-to-hip ratio; WST, waist circumference. Numbers in bold face are statistically significant. £The number of risk genotypes was defined on the basis of Kaplan-Meier's analysis as follows: 0 (none or 1 risk allele) and 1 (2 risk alleles). †Multivariate regression was adjusted by age at enrollment, education, body mass index, hip and waist circumferences (both in WHR strata; hip only in WST strata), waist-to-hip ratio (in MET and SFA strata), age at menopause, total months of breastfeeding, OC use (in total analysis), and exogenous estrogen plus progestin. \*p values were adjusted to correct for multiple testing via the Benjamini-Hochberg approach. §In the viscerally obese group (WHR), only the ONECUT2 rs4092465 GA genotype was analyzed.
